# Supplementary material for: The in situ fabrication of ZIF-67 on titania-coated magnetic nanoparticles: a new platform for the immobilization of Pd(ii) with enhanced catalytic activity for organic transformations
Source: Royal Society of Chemistry journal article supplement (doi:10.1039/d1nj03738b), 2021-01-01
Supplement: d1nj03738b1.pdf [file d1nj03738b1.pdf]

## Supporting Information

### **In situ fabrication of ZIF-67 on titania coated magnetic nanoparticles: A new platform for the immobilization of Pd(II) with enhanced catalytic activity in organic transformations**

Sukanya Sharma, Chandan Sharma, Manpreet Kaur and Satya Paul \*

*Department of Chemistry, University of Jammu, Jammu 180006, India. Fax: +91-191-2431365;*

*Tel: +91-191-2453969; Email: [paul7@rediffmail.com](mailto:paul7@rediffmail.com).*

| <b>List of Contents</b>                                                                                                                                                                                                      | <b>Page no.</b> |
|------------------------------------------------------------------------------------------------------------------------------------------------------------------------------------------------------------------------------|-----------------|
| Figure S1. HR-TEM micrographs of Pd@ZIF-67-Fe <sub>3</sub> O <sub>4</sub> -TiO <sub>2</sub> .                                                                                                                                | 2               |
| Figure S2. CHN analysis of Fe <sub>3</sub> O <sub>4</sub> -TiO <sub>2</sub> -NH <sub>2</sub> and Pd@ZIF-67-Fe <sub>3</sub> O <sub>4</sub> -TiO <sub>2</sub>                                                                  | 2               |
| Table S1. Effect of different solvents and temperature on Pd(@ZIF-67-Fe <sub>3</sub> O <sub>4</sub> -TiO <sub>2</sub> catalyzed reduction of nitroarenes and $\alpha,\beta$ -unsaturated carbonyl compounds <sup>a,b,c</sup> | 3               |
| Table S2. Recyclability of Pd@ZIF-67-Fe <sub>3</sub> O <sub>4</sub> -TiO <sub>2</sub> for oxidation, reduction and oxidative deprotection of oximes                                                                          | 4               |
| S1. Spectral details of the compounds listed in Table 4                                                                                                                                                                      | 5-7             |
| S2. Spectral details of the compounds listed in Table 5                                                                                                                                                                      | 8-11            |
| S3. Spectral details of the compounds listed in Table 6                                                                                                                                                                      | 11              |
| S4. <sup>1</sup> H NMR and <sup>13</sup> C NMR spectra of compounds listed in Table 4                                                                                                                                        | 12-35           |
| S5. <sup>1</sup> H NMR and <sup>13</sup> C NMR spectra of compounds listed in Table 5                                                                                                                                        | 36-56           |
| S6. <sup>1</sup> H NMR and <sup>13</sup> C NMR spectra of compounds listed in Table 6                                                                                                                                        | 57-59           |

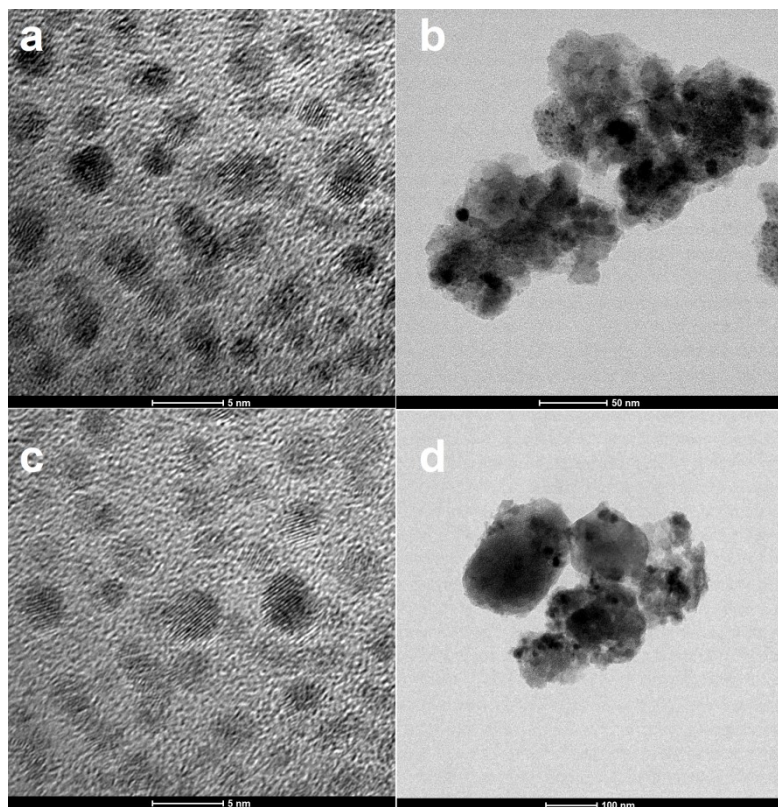

**Fig. S1** HR-TEM micrographs of Pd@ZIF-67-Fe<sub>3</sub>O<sub>4</sub>-TiO<sub>2</sub>.

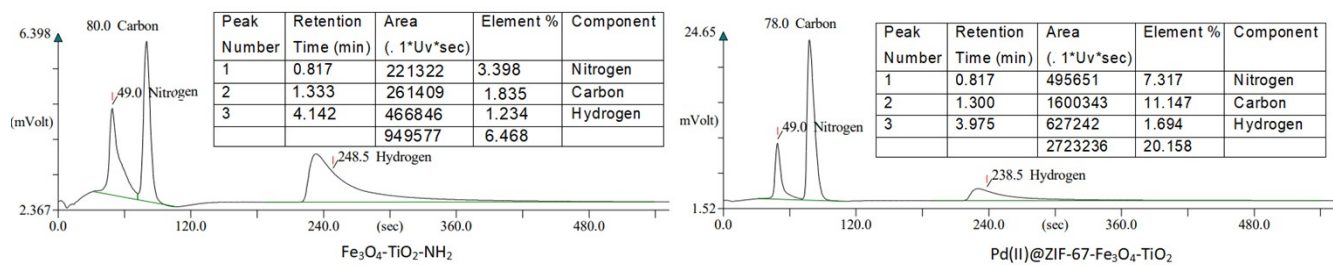

**Fig. S2** CHN analysis of Fe<sub>3</sub>O<sub>4</sub>-TiO<sub>2</sub>-NH<sub>2</sub> and Pd@ZIF-67-Fe<sub>3</sub>O<sub>4</sub>-TiO<sub>2</sub>.

**Table S1.** Effect of different solvents and temperature on Pd@ZIF-67-Fe<sub>3</sub>O<sub>4</sub>-TiO<sub>2</sub> catalyzed reduction of nitroarenes and  $\alpha,\beta$ -unsaturated carbonyl compounds<sup>a,b,c</sup>

| Entry | Solvent                                    | Temperature (°C) | Nitroarenes |                        | $\alpha,\beta$ -unsaturated carbonyl compounds |                        |
|-------|--------------------------------------------|------------------|-------------|------------------------|------------------------------------------------|------------------------|
|       |                                            |                  | Time (h)    | Yield <sup>c</sup> (%) | Time (h)                                       | Yield <sup>c</sup> (%) |
| 1     | H <sub>2</sub> O                           | RT               | 3           | 45                     | 4                                              | 40                     |
| 2     | H <sub>2</sub> O                           | 60               | 3           | 65                     | 4                                              | 45                     |
| 3     | H <sub>2</sub> O                           | 80               | 1           | 95                     | 4                                              | 50                     |
| 4     | H <sub>2</sub> O                           | 100              | 1           | 96                     | 4                                              | 60                     |
| 5     | CH <sub>3</sub> CN                         | 80               | 3           | 80                     | 3                                              | 70                     |
| 6     | CH <sub>3</sub> CN: H <sub>2</sub> O (1:1) | 80               | 3           | 82                     | 3                                              | 68                     |
| 7     | EtOH                                       | 80               | 3           | 50                     | 1.5                                            | 90                     |
| 8     | EtOH: H <sub>2</sub> O (1:3)               | 80               | 3           | 55                     | 1.5                                            | 95                     |
| 9     | EtOH: H <sub>2</sub> O (1:3)               | 100              | 2           | 60                     | 1.5                                            | 96                     |
| 10    | Toluene                                    | 100              | 3           | 70                     | 3                                              | 60                     |

Reaction conditions: <sup>a</sup>4-nitroaniline (1 mmol), Pd@ZIF-67-Fe<sub>3</sub>O<sub>4</sub>-TiO<sub>2</sub>(0.1 g, 7.5 mol% Pd), solvent (8 mL) under H<sub>2</sub> atmosphere at 80 °C. <sup>b</sup>1-(4-methoxyphenyl)-3-phenylprop-2-ene-1-one (1 mmol), Pd@ZIF-67-Fe<sub>3</sub>O<sub>4</sub>-TiO<sub>2</sub> (0.1 g, 7.5 mol% Pd), solvent ( 8 mL) under H<sub>2</sub> atmosphere at 80 °C. <sup>c</sup>Column chromatography yield.

**Table S2** Recyclability of Pd@ZIF-67-Fe<sub>3</sub>O<sub>4</sub>-TiO<sub>2</sub> for oxidation, reduction and oxidative deprotection of oximes

| Catalytic runs | Oxidation <sup>a</sup> |                        | Reduction <sup>b</sup> |                        | Oxidative deprotection of oximes <sup>c</sup> |                        |
|----------------|------------------------|------------------------|------------------------|------------------------|-----------------------------------------------|------------------------|
|                | Catalyst amount (g)    | Yield <sup>d</sup> (%) | Catalyst amount (g)    | Yield <sup>d</sup> (%) | Catalyst amount (g)                           | Yield <sup>e</sup> (%) |
| 1              | 0.1                    | 88                     | 0.1                    | 95                     | 0.1                                           | 92                     |
| 2              | 0.095                  | 86                     | 0.092                  | 94                     | 0.094                                         | 91                     |
| 3              | 0.091                  | 85                     | 0.089                  | 92                     | 0.091                                         | 89                     |
| 4              | 0.088                  | 82                     | 0.085                  | 89                     | 0.087                                         | 87                     |
| 5              | 0.085                  | 81                     | 0.080                  | 88                     | 0.082                                         | 84                     |

<sup>a</sup>Reaction conditions: 4-methoxybenzyl alcohol (1 mmol), TBHP (1 mmol), Pd@ZIF-67-Fe<sub>3</sub>O<sub>4</sub>-TiO<sub>2</sub> (0.1 g, 7.5 mol% Pd) in EtOH (8 mL) at 80 °C. <sup>b</sup>Reaction conditions: 4-nitroaniline (1 mmol), Pd@ZIF-67-Fe<sub>3</sub>O<sub>4</sub>-TiO<sub>2</sub> (0.1 g, 7.5 mol % Pd) in H<sub>2</sub>O (8 mL) under H<sub>2</sub> atmosphere at 80 °C. <sup>c</sup>Reaction conditions: 4-bromobenzaldehyde oxime (1 mmol), TEMPO (0.03 g, 0.2 mmol) and Pd@ZIF-67-Fe<sub>3</sub>O<sub>4</sub>-TiO<sub>2</sub> (0.1 g, 7.5 mol % Pd) in toluene (5 mL) at 60 °C. <sup>d</sup>Column chromatographic yield. <sup>e</sup>Isolated yields.

## S1. Spectral details of compounds listed in Table 4

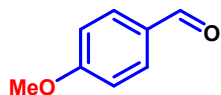

### 4-Methoxybenzaldehyde (2a)

$^1\text{H}$  NMR (400 MHz,  $\text{CDCl}_3$ ):  $\delta$  9.71 (s, 1H, CHO), 7.66 (d,  $J = 8.7$  Hz, 2H, ArH), 6.83 (d,  $J = 8.6$  Hz, 2H, ArH), 3.69 (s, 3H,  $\text{OCH}_3$ );  $^{13}\text{C}$  NMR (100 MHz,  $\text{CDCl}_3$ ):  $\delta$  190.71, 164.50, 131.93, 129.62, 114.20, 55.23.

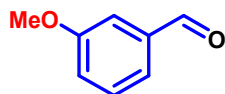

### 3-Methoxybenzaldehyde (2b)

$^1\text{H}$  NMR (400 MHz,  $\text{CDCl}_3$ )  $\delta$  9.97 (s, 1H, CHO), 7.45 (d,  $J = 6.3$  Hz, 2H, ArH), 7.39 (s, 1H, ArH), 7.18 – 7.17 (m, 1H, ArH), 3.86 (s, 3H,  $\text{OCH}_3$ );  $^{13}\text{C}$  NMR (101 MHz,  $\text{CDCl}_3$ ):  $\delta$  192.07, 160.12, 137.86, 129.93, 123.70, 121.55, 111.69, 54.98.

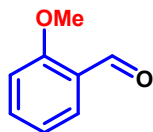

### 2-Methoxybenzaldehyde (2c)

$^1\text{H}$  NMR (400 MHz,  $\text{CDCl}_3$ ):  $\delta$  10.50 (s, 1H, CHO), 7.86 (d,  $J = 7.7$  Hz, 1H, Ar-H), 7.58 (t,  $J = 7.9$  Hz, 1H, Ar-H), 7.01-7.08 (m, 2H, Ar-H), 3.96 (s, 3H,  $\text{OCH}_3$ );  $^{13}\text{C}$  NMR (100 MHz,  $\text{CDCl}_3$ ):  $\delta$  189.90, 161.81, 135.91, 128.55, 124.49, 120.69, 111.68, 55.74.

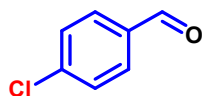

### 4-Chlorobenzaldehyde (2d)

$^1\text{H}$  NMR (400 MHz,  $\text{CDCl}_3$ ):  $\delta$  10.00 (s, 1H, CHO), 7.84 (d,  $J = 8.3$  Hz, 2H, Ar-H), 7.53 (d,  $J = 8.3$  Hz, 2H, Ar-H);  $^{13}\text{C}$  NMR (100 MHz,  $\text{CDCl}_3$ ):  $\delta$  191.05, 140.96, 134.58, 130.60, 129.31.

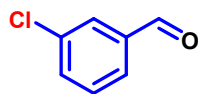

### 3-Chlorobenzaldehyde (2e)

$^1\text{H}$  NMR (400 MHz,  $\text{CDCl}_3$ ):  $\delta$  9.94 (s, 1H, CHO), 7.77 (s, 1H, Ar-H), 7.71 (d,  $J = 7.5$  Hz, 1H, Ar-H), 7.53 (d,  $J = 8.0$  Hz, 1H, Ar-H), 7.42 (t,  $J = 7.8$  Hz, 1H, Ar-H);  $^{13}\text{C}$  NMR (100 MHz,  $\text{CDCl}_3$ ):  $\delta$  190.81, 137.96, 135.33, 134.30, 130.36, 129.12, 127.98.

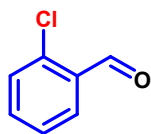

### 2-Chlorobenzaldehyde (2f)

$^1\text{H}$  NMR (400 MHz,  $\text{CDCl}_3$ ):  $\delta$  10.34 (s, 1H, CHO), 7.79 (d,  $J = 7.6$ , 1H, Ar-H), 7.44-7.27 (m, 3H, ArH);  $^{13}\text{C}$  NMR (100 MHz,  $\text{CDCl}_3$ ):  $\delta$  189.69, 137.78, 135.15, 132.28, 130.53, 129.26, 127.25.

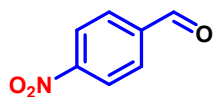

### 4-Nitrobenzaldehyde (2g)

$^1\text{H}$  NMR (400 MHz,  $\text{CDCl}_3$ ):  $\delta$  10.19 (s, 1H, CHO), 8.43 (d,  $J = 8.5$  Hz, 2H, Ar-H), 8.11 (d,  $J = 8.5$  Hz, 2H, Ar-H);  $^{13}\text{C}$  NMR (100 MHz,  $\text{CDCl}_3$ ):  $\delta$  190.63, 151.87, 140.16, 130.63, 124.55.

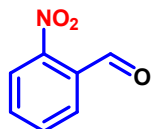

### 2-Nitrobenzaldehyde (2h)

$^1\text{H}$  NMR (400 MHz,  $\text{CDCl}_3$ ):  $\delta$  10.42 (s, 1H, CHO), 8.13 (d,  $J = 8$  Hz, 1H, Ar-H), 7.96 (d,  $J = 8$  Hz, 1H, Ar-H), 7.76-7.84 (m, 2H, Ar-H);  $^{13}\text{C}$  NMR (100 MHz,  $\text{CDCl}_3$ ):  $\delta$  188.24, 149.48, 133.92, 133.56, 131.22, 129.27, 124.32.

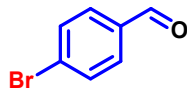

### 4-Bromobenzaldehyde (2i)

$^1\text{H}$  NMR (400 MHz,  $\text{CDCl}_3$ ):  $\delta$  10.00 (s, 1H, CHO), 7.78 (d,  $J = 7.8$  Hz, 2H, Ar-H), 7.71 (d,  $J = 7.8$  Hz, 2H, Ar-H);  $^{13}\text{C}$  NMR (100 MHz,  $\text{CDCl}_3$ ):  $\delta$  197.49, 140.16, 137.54, 136.51, 133.91.

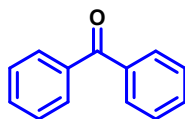

### Benzophenone (2j)

$^1\text{H}$  NMR (400 MHz,  $\text{CDCl}_3$ ):  $\delta$  7.84 (d,  $J = 8.1$  Hz, 4H, Ar-H), 7.62 (t,  $J = 7.4$  Hz, 2H, Ar-H), 7.51 (t,  $J = 7.6$  Hz, 4H, Ar-H);  $^{13}\text{C}$  NMR (100 MHz,  $\text{CDCl}_3$ ):  $\delta$  197.01, 137.61, 132.44, 129.99, 128.41.

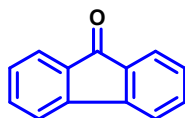

### Fluorenone (2k)

$^1\text{H}$  NMR (400 MHz,  $\text{CDCl}_3$ ):  $\delta$  7.68 (d,  $J = 7.3$  Hz, 2H), 7.55-7.49 (m, 4H), 7.32 (t,  $J = 7.2$  Hz, 2H);  $^{13}\text{C}$  NMR (100 MHz,  $\text{CDCl}_3$ ):  $\delta$  198.45, 144.52, 134.54, 133.94, 129.26, 124.36, 120.33.

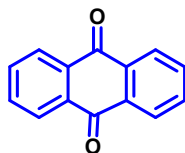

### Anthraquinone (2l)

$^1\text{H}$  NMR (400 MHz,  $\text{CDCl}_3$ ):  $\delta$  8.35 (dd,  $J = 5.8, 3.3$  Hz, 4H, ArH), 7.84 (dd,  $J = 5.8, 3.3$  Hz, 4H, ArH);  $^{13}\text{C}$  NMR (100 MHz,  $\text{CDCl}_3$ ):  $\delta$  184.26, 137.19, 136.97, 130.85.

## S2. Spectral details of the compounds listed in Table 5

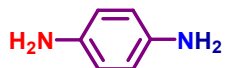

### 1,4-diaminobenzene (4a)

$^1\text{H}$  NMR (400 MHz,  $\text{CDCl}_3$ ):  $\delta$  6.60 (s, 4H, ArH), 3.23 (bs, 4H,  $\text{NH}_2$ );  $^{13}\text{C}$  NMR (100 MHz,  $\text{CDCl}_3$ ):  $\delta$  138.59, 116.74.

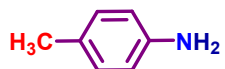

### 4-methylaniline (4b)

$^1\text{H}$  NMR (400 MHz, DMSO):  $\delta$  6.82 (d,  $J = 8.1$  Hz, 2H, ArH), 6.47 (d,  $J = 8.2$  Hz, 2H, ArH), 4.78 (s, 2H,  $\text{NH}_2$ ), 3.35 (s, 3H,  $\text{CH}_3$ );  $^{13}\text{C}$  NMR (100 MHz, DMSO):  $\delta$  146.53, 129.69, 124.54, 114.76, 20.73.

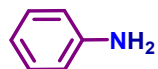

### Aniline (4c)

$^1\text{H}$  NMR (400 MHz,  $\text{CDCl}_3$ ):  $\delta$  7.31 (t,  $J = 6.9$  Hz, 2H, ArH), 6.92 (t,  $J = 7.9$  Hz, 1H, ArH), 6.79 (d,  $J = 8.4$  Hz, 2H, ArH), 3.69 (s, 2H,  $\text{NH}_2$ );  $^{13}\text{C}$  NMR (100 MHz,  $\text{CDCl}_3$ ):  $\delta$  146.68, 129.47, 118.61, 115.29.

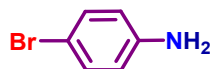

### 4-Bromoaniline (4d)

$^1\text{H}$  NMR (400 MHz,  $\text{CDCl}_3$ ):  $\delta$  7.26 (d, 2H,  $J = 8.7$  Hz, ArH), 6.59 (d, 2H,  $J = 8.7$  Hz, ArH), 3.69 (s, 2H,  $\text{NH}_2$ );  $^{13}\text{C}$  NMR (100 MHz,  $\text{CDCl}_3$ ):  $\delta$  145.41, 132.02, 116.72, 110.22.

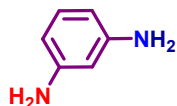

### 1,3-diaminobenzene (4e)

$^1\text{H}$  NMR (400 MHz,  $\text{CDCl}_3$ ):  $\delta$  6.95 (t,  $J = 7.7$  Hz, 1H, ArH), 6.18 (d,  $J = 8.5$  Hz, 2H, ArH), 6.05 (s, 1H, ArH), 3.55 (bs, 4H,  $\text{NH}_2$ );  $^{13}\text{C}$  NMR (100 MHz,  $\text{CDCl}_3$ ):  $\delta$  149.19, 132.07, 106.79, 103.22.

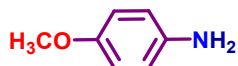



#### 4-methoxyaniline (4f)

$^1\text{H}$  NMR (400 MHz,  $\text{CDCl}_3$ ):  $\delta$  6.77 (d,  $J = 8$  Hz, 2H, ArH), 6.67 (d,  $J = 8$  Hz, 2H, ArH), 3.77 (s, 3H,  $\text{COCH}_3$ ), 3.44 (bs, 2H,  $\text{NH}_2$ );  $^{13}\text{C}$  NMR (100 MHz,  $\text{CDCl}_3$ ):  $\delta$  152.82, 139.96, 116.43, 114.83, 55.75.

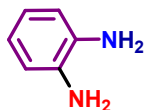

#### 1,2-diaminobenzene (4g)

$^1\text{H}$  NMR (400 MHz, DMSO):  $\delta$  6.52-6.48 (m, 2H, ArH), 6.40-6.36 (m, 2H, ArH), 4.38 (s, 4H,  $\text{NH}_2$ );  $^{13}\text{C}$  NMR (100 MHz, DMSO):  $\delta$  135.39, 117.73, 114.98.

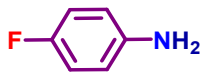

#### 4-Fluoroaniline (4h)

$^1\text{H}$  NMR (400 MHz,  $\text{CDCl}_3$ ):  $\delta$  6.89 (t, 2H,  $J = 8.6$  Hz, ArH), 6.63 (dd, 2H,  $J = 8.6$  Hz, 4.5 Hz, ArH), 3.60 (s, 2H,  $\text{NH}_2$ );  $^{13}\text{C}$  NMR (100 MHz,  $\text{CDCl}_3$ ):  $\delta$  156.38 (d,  $J = 235.2$  Hz), 142.57 (d,  $J = 2.0$  Hz), 116.10 (d,  $J = 7.6$  Hz), 115.69 (d,  $J = 22.4$  Hz).

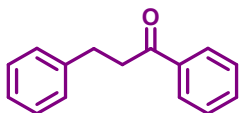

#### 1,3-diphenylpropan-1-one (6a)

$^1\text{H}$  NMR (400 MHz,  $\text{CDCl}_3$ ):  $\delta$  7.99 (d,  $J = 7.4$  Hz, 2H, ArH), 7.59 (t,  $J = 7.4$  Hz, 1H, ArH), 7.48 (t,  $J = 7.6$  Hz, 2H, ArH), 7.35-7.22 (m, 5H), 3.34 (t,  $J = 7.7$  Hz, 2H,  $\text{CH}_2$ ), 3.10 (t,  $J = 7.7$  Hz, 2H,  $\text{CH}_2$ );  $^{13}\text{C}$  NMR (100 MHz,  $\text{CDCl}_3$ ):  $\delta$  199.50, 141.43, 136.84, 133.12, 128.64, 128.56, 128.45, 128.06, 126.16, 40.47, 29.94.

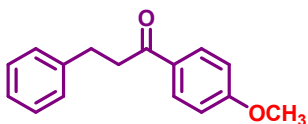

#### 1-(4-methoxyphenyl)-3-phenylpropan-1-one (6b)

$^1\text{H}$  NMR (400 MHz,  $\text{CDCl}_3$ ):  $\delta$  7.97 (d,  $J = 8.8$  Hz, 2H, ArH), 7.35 – 7.27 (m, 4H, ArH), 7.23 (t,  $J = 7.1$  Hz, 1H, ArH), 6.95 (d,  $J = 8.8$  Hz, 2H, ArH), 3.89 (s, 3H,  $\text{OCH}_3$ ), 3.28 (t,  $J = 7.7$  Hz, 2H,

CH<sub>2</sub>), 3.08 (t, J = 7.7 Hz, 2H, CH<sub>2</sub>); <sup>13</sup>C NMR (100 MHz, CDCl<sub>3</sub>): δ 197.85, 163.50, 141.48, 130.31, 130.01, 128.50, 128.42, 126.08, 113.74, 55.46, 40.11, 30.35

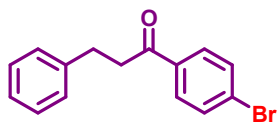

#### 1-(4-bromophenyl)-3-phenylpropan-1-one (6c)

<sup>1</sup>H NMR (400 MHz, CDCl<sub>3</sub>): δ 7.99 (d, J = 7.1 Hz, 2H, ArH), 7.59 (t, J = 8.0 Hz, 1H, ArH), 7.48 (t, J = 7.6 Hz, 2H, ArH), 7.31 (d, J = 8.4 Hz, 2H, ArH), 7.23 (d, J = 8.5 Hz, 2H, ArH), 3.34 (t, J = 7.75 Hz, 2H, CH<sub>2</sub>), 3.10 (t, J = 7.7 Hz, 2H, CH<sub>2</sub>); <sup>13</sup>C NMR (100 MHz, CDCl<sub>3</sub>): δ 199.21, 141.30, 136.86, 133.08, 128.62, 128.54, 128.44, 128.05, 126.15, 40.47, 30.14.

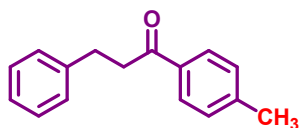

#### 1-(4-methylphenyl)-3-phenylpropan-1-one (6d)

<sup>1</sup>H NMR (400 MHz, CDCl<sub>3</sub>): δ 7.90 (d, J = 7.9 Hz, 2H, ArH), 7.36 – 7.23 (m, 7H, ArH), 3.32 (t, J = 7.7 Hz, 2H, CH<sub>2</sub>), 3.10 (t, J = 7.6 Hz, 2H, CH<sub>2</sub>), 2.44 (s, 3H, ArCH<sub>3</sub>); <sup>13</sup>C NMR (100 MHz, CDCl<sub>3</sub>): δ 198.98, 143.89, 141.47, 134.38, 129.32, 128.55, 128.47, 128.21, 126.14, 40.39, 30.23, 21.68.

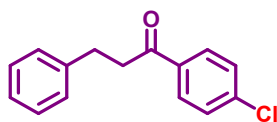

#### 1-(4-chlorophenyl)-3-phenylpropan-1-one (6e)

<sup>1</sup>H NMR (400 MHz, CDCl<sub>3</sub>): δ 7.98 (d, J = 7.1 Hz, 2H, ArH), 7.59 (t, J = 7.4 Hz, 1H, ArH), 7.48 (t, J = 7.6 Hz, 2H, ArH), 7.29 (d, J = 8.4 Hz, 2H, ArH), 7.21 (d, J = 8.5 Hz, 2H, ArH), 3.31 (t, J = 7.5 Hz, 2H, CH<sub>2</sub>), 3.07 (t, J = 7.5 Hz, 2H, CH<sub>2</sub>); <sup>13</sup>C NMR (100 MHz, CDCl<sub>3</sub>): δ 198.84, 139.75, 136.79, 133.16, 131.89, 129.83, 128.65, 128.61, 128.02, 40.13, 29.39.

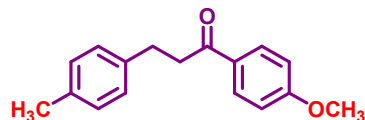

### 3-(4-methylphenyl)-1-(4'-methoxyphenyl)propan-1-one (6f)

$^1\text{H}$  NMR (400 MHz,  $\text{CDCl}_3$ ):  $\delta$  7.96 (d,  $J = 8.7$  Hz, 2H, ArH), 7.18-7.11 (m, 4H), 6.94 (d,  $J = 8.7$  Hz, 2H, ArH), 3.92 (s, 3H), 3.25 (t,  $J = 7.8$  Hz, 2H,  $\text{CH}_2$ ), 3.03 (t,  $J = 7.7$  Hz, 2H,  $\text{CH}_2$ ), 2.34 (s, 3H);  $^{13}\text{C}$  NMR (100 MHz,  $\text{CDCl}_3$ ):  $\delta$  197.93, 163.60, 138.36, 135.60, 130.33, 129.20, 128.31, 113.72, 55.69, 40.44, 29.91, 21.35.

### S3. Spectral details of the compounds listed in Table 6

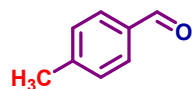

### 4-Methylbenzaldehyde (8f)

$^1\text{H}$  NMR (400 MHz,  $\text{CDCl}_3$ ):  $\delta$  9.97 (s, 1H, CHO), 7.78 (d,  $J = 7.7$  Hz, 2H, ArH), 7.34 (d,  $J = 7.7$  Hz, 2H, ArH), 2.44 (s, 3H,  $\text{CH}_3$ );  $^{13}\text{C}$  NMR (101 MHz,  $\text{CDCl}_3$ ):  $\delta$  192.10, 145.52, 134.16, 129.74, 129.05, 21.91.

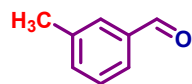

### 3-Methylbenzaldehyde (8g)

$^1\text{H}$  NMR (400 MHz,  $\text{CDCl}_3$ ):  $\delta$  10.01 (s, 1H, CHO), 7.71-7.69 (m, 2H, ArH), 7.48-7.42 (m, 2H, ArH), 2.46 (s, 3H,  $\text{CH}_3$ );  $^{13}\text{C}$  NMR (101 MHz,  $\text{CDCl}_3$ ):  $\delta$  192.70, 138.94, 136.46, 135.34, 130.05, 128.90, 127.27, 20.94.

S4. <sup>1</sup>H NMR and <sup>13</sup>C NMR spectra of compounds listed in Table 4

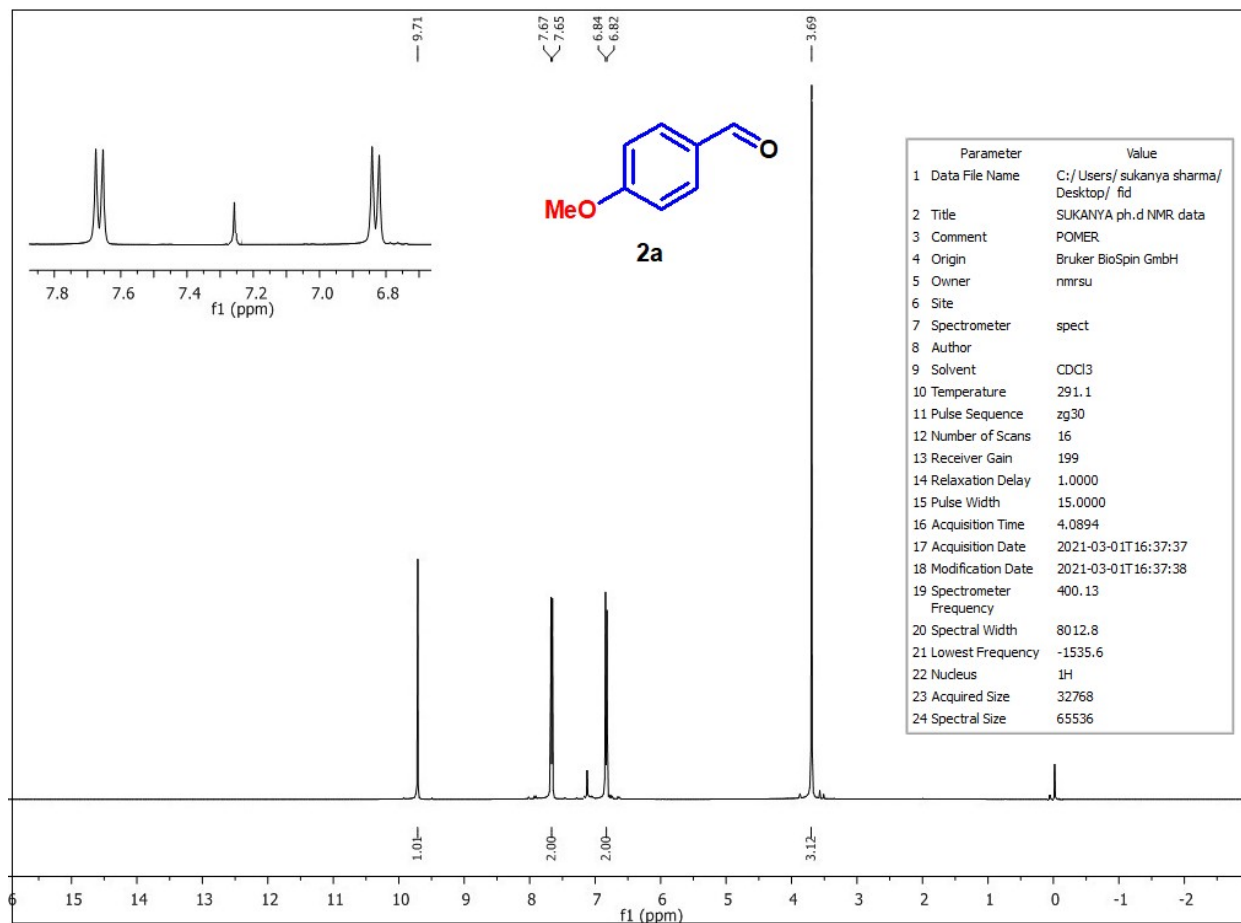

**Figure 1.** <sup>1</sup>H NMR spectra of 4-Methoxybenzaldehyde.

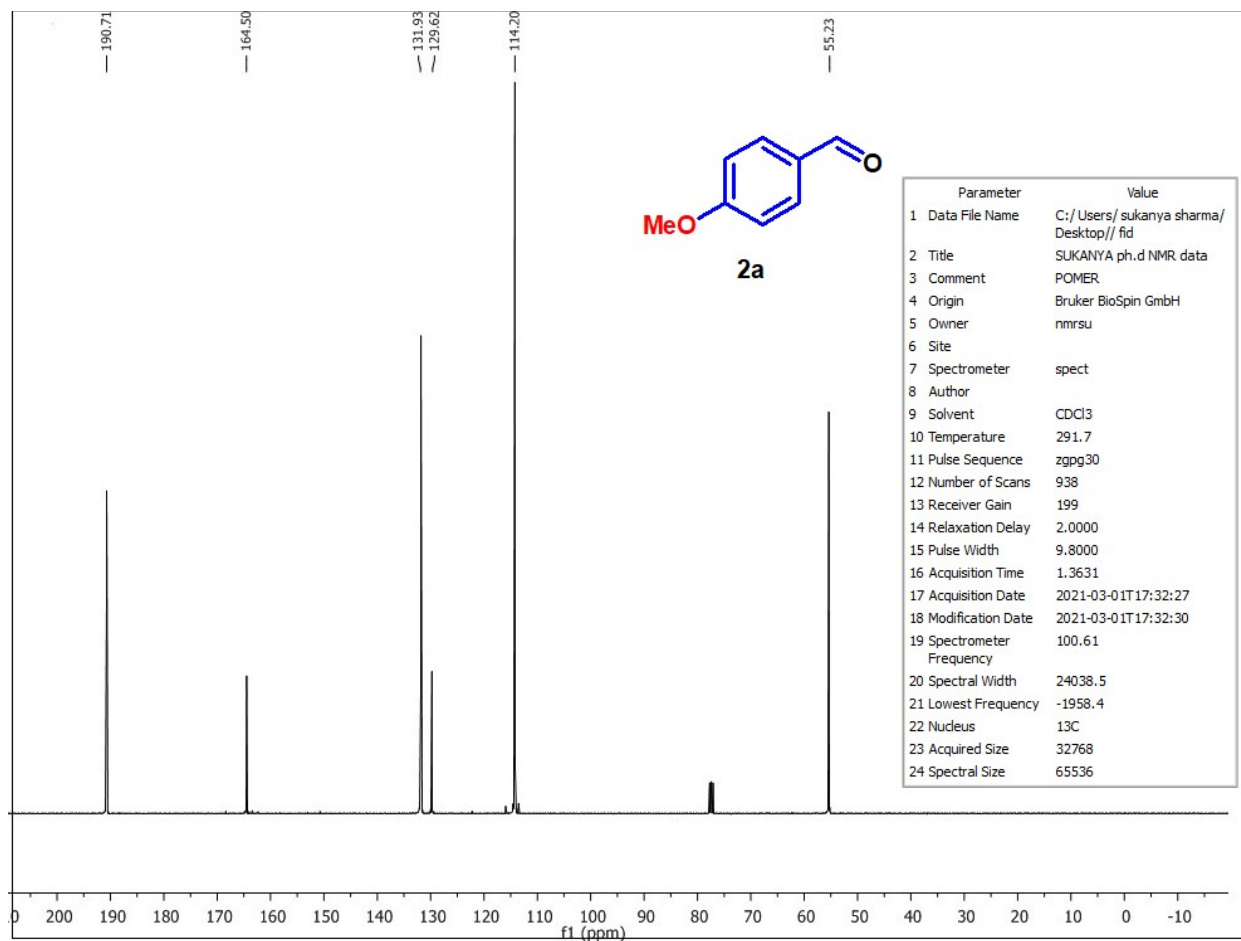

Figure 2.  $^{13}\text{C}$  NMR spectra of 4-Methoxybenzaldehyde.

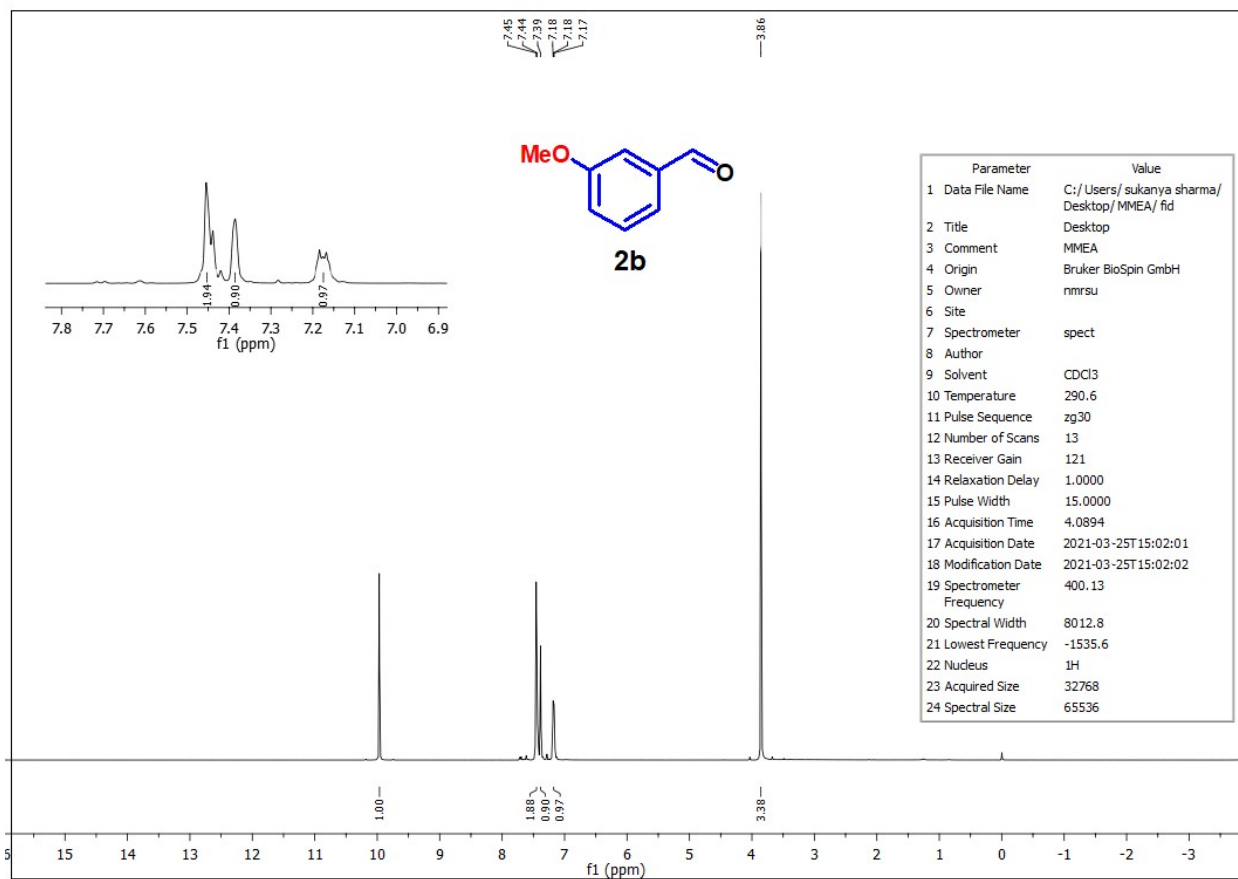

**Figure 3.** <sup>1</sup>H NMR spectra of 3-Methoxybenzaldehyde.

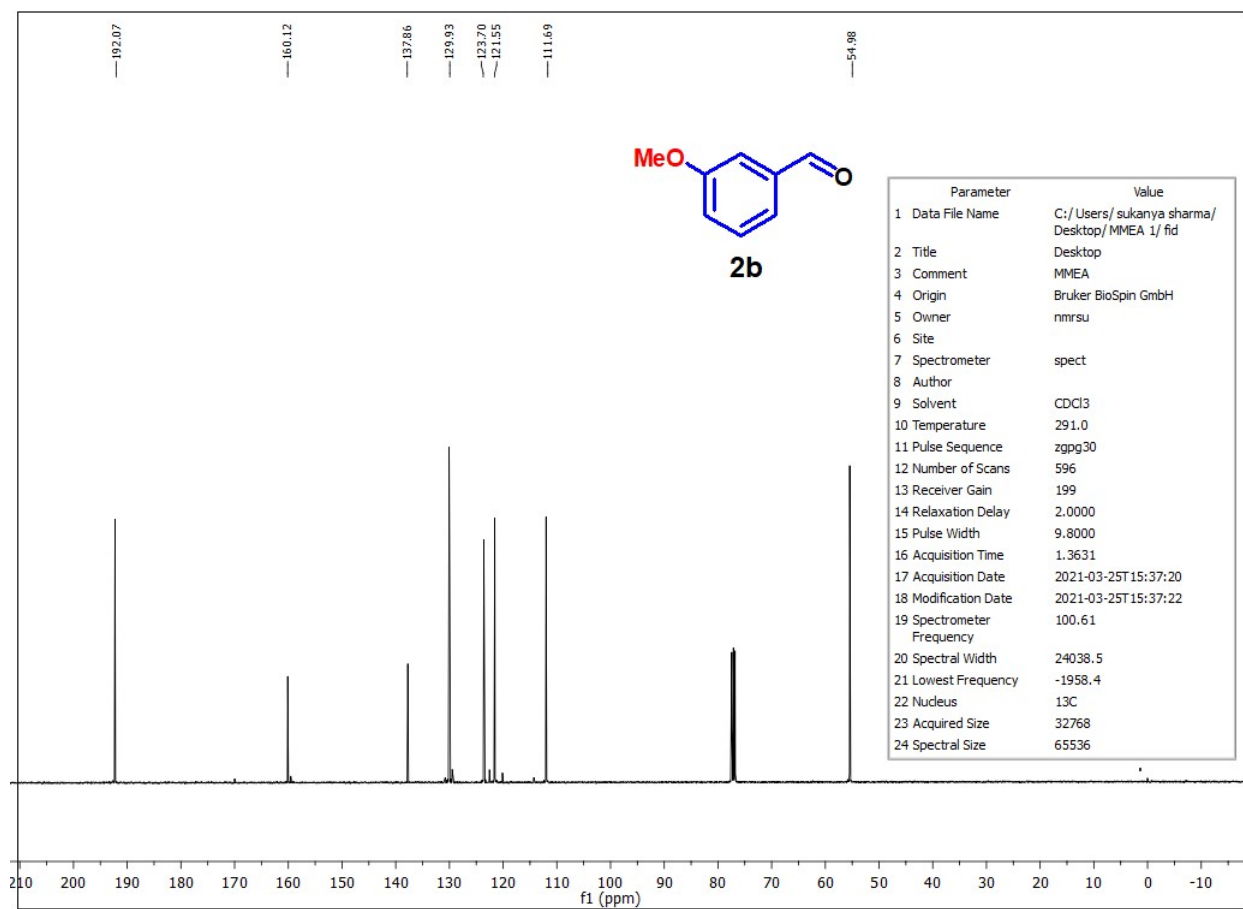

**Figure 4.**  $^{13}\text{C}$  NMR spectra of 3-Methoxybenzaldehyde.

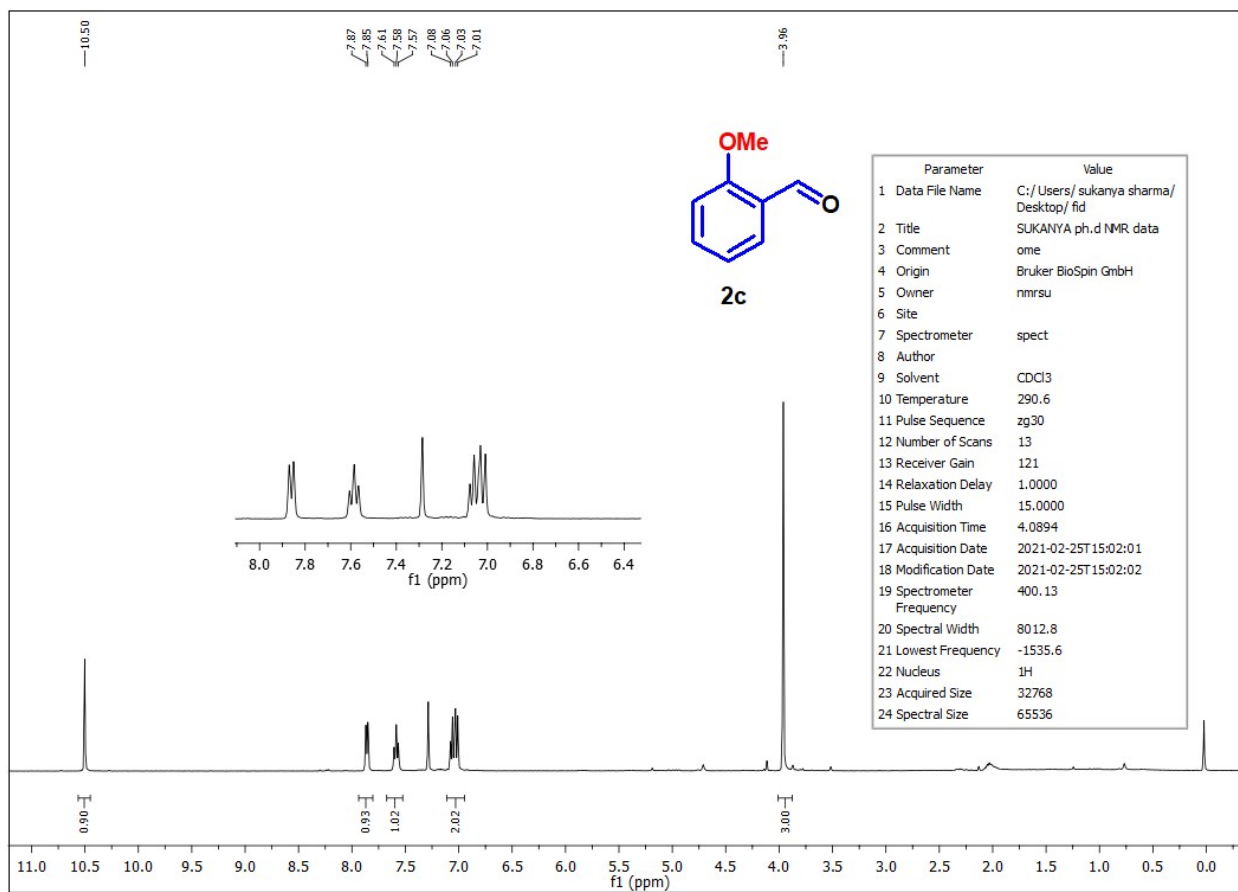

**Figure 5.** <sup>1</sup>H NMR spectra of 2-Methoxybenzaldehyde.



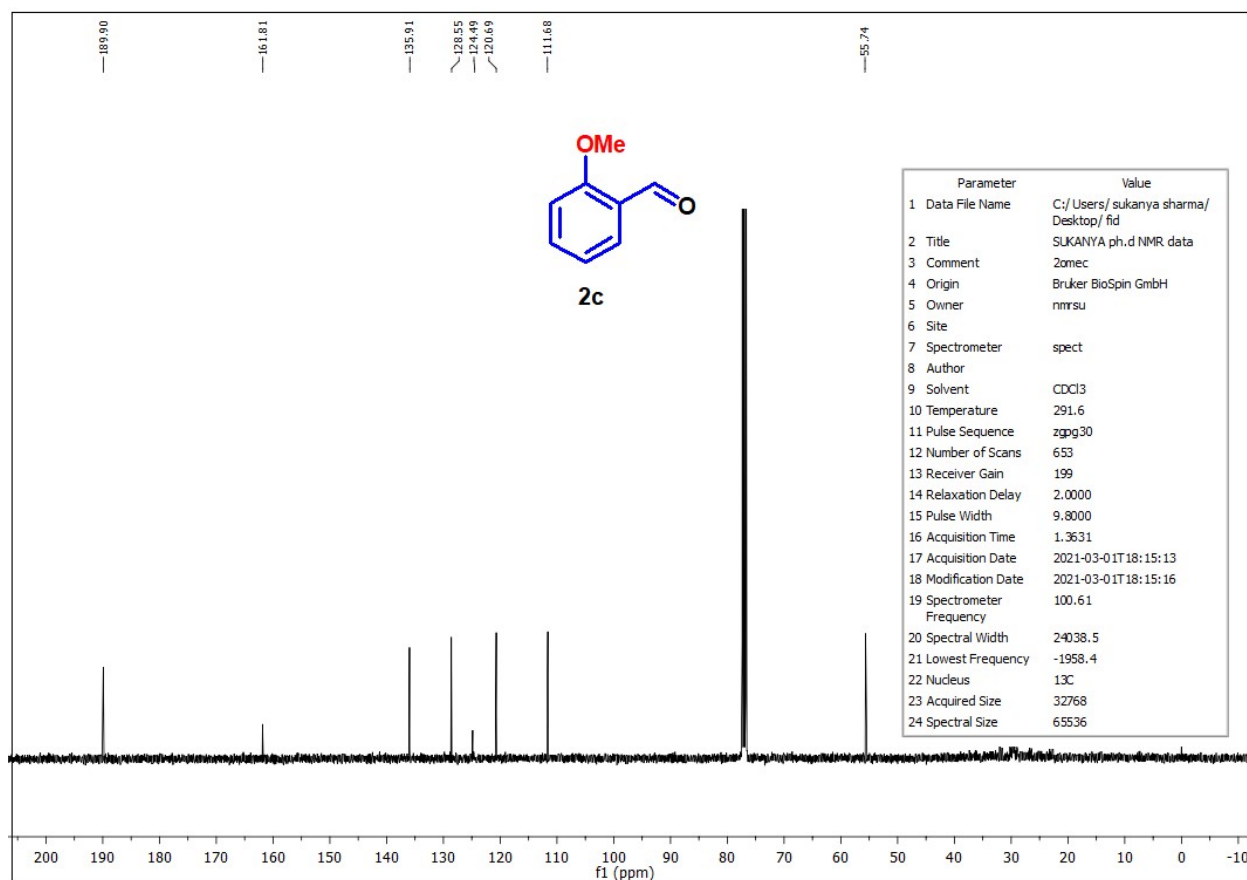

**Figure 6.**  $^{13}\text{C}$  NMR spectra of 2-Methoxybenzaldehyde.

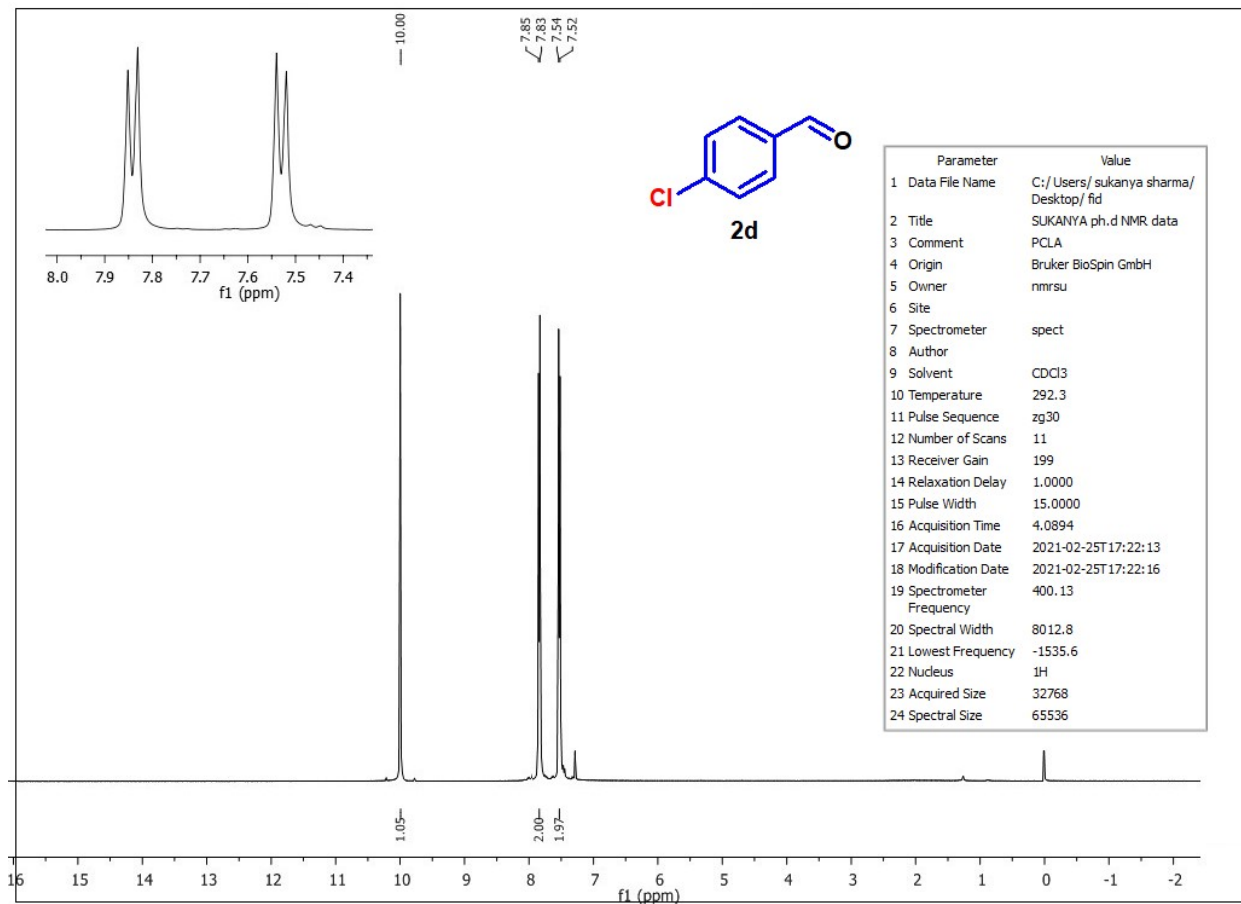

**Figure 7.** <sup>1</sup>H NMR spectra of 4-Chlorobenzaldehyde.

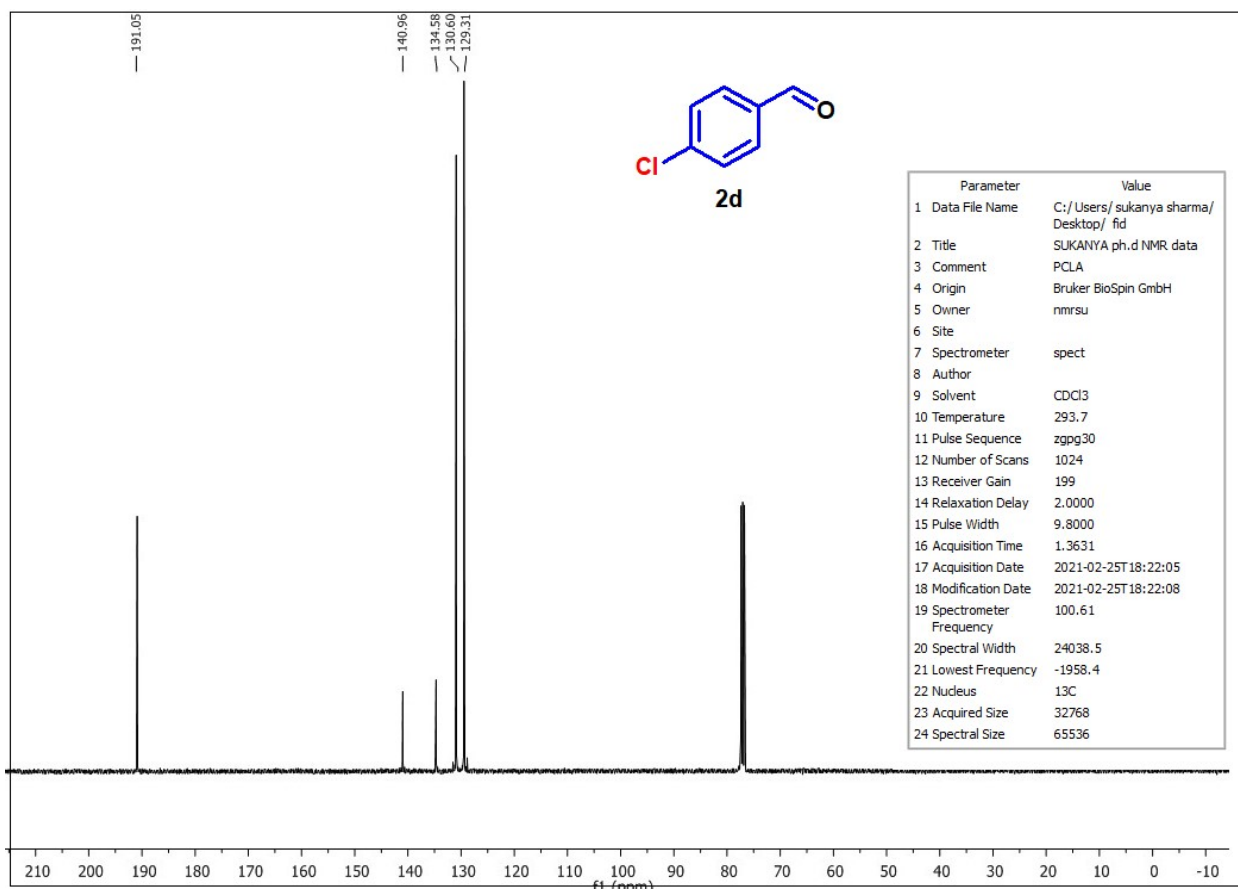

**Figure 8.**  $^{13}\text{C}$  NMR spectra of 4-Chloro benzaldehyde.

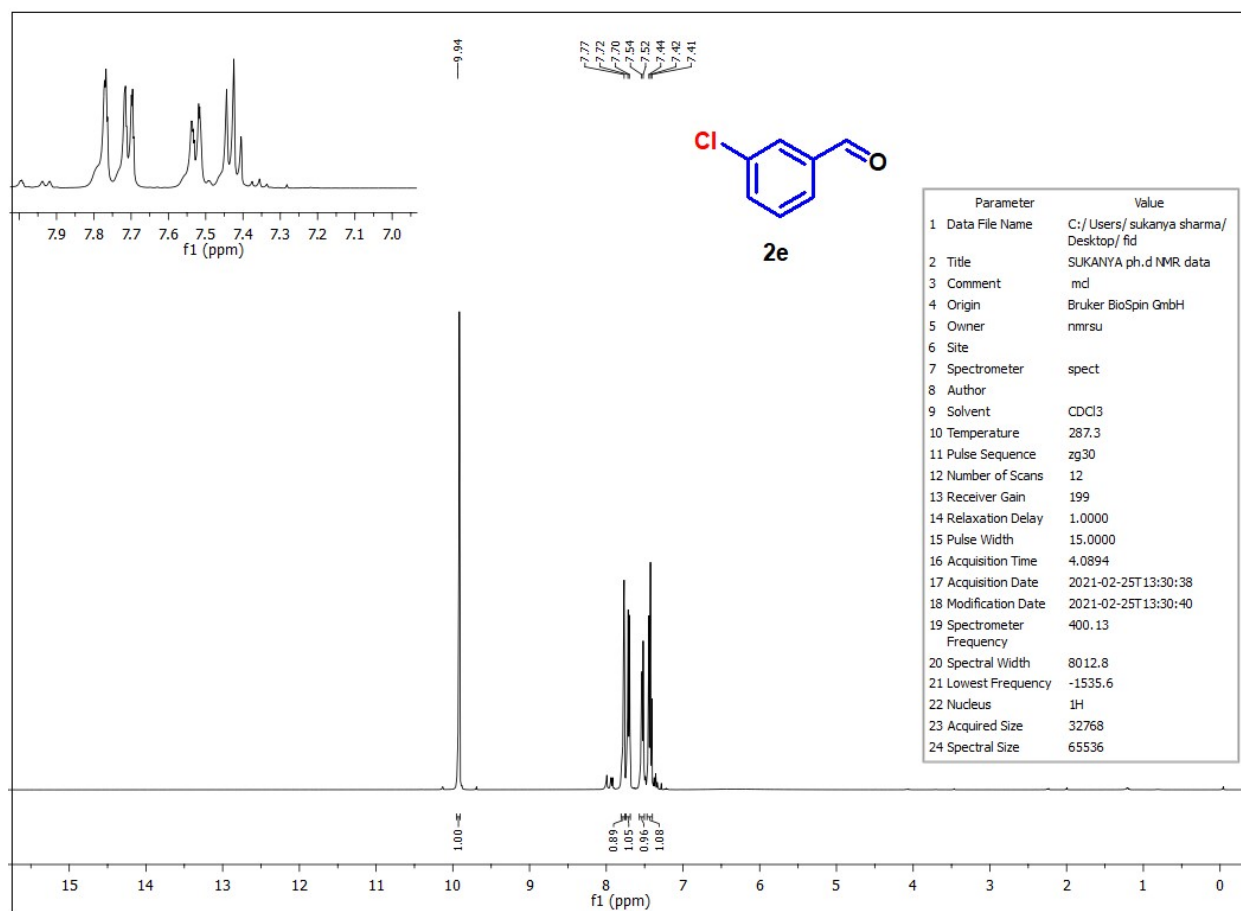

**Figure 9.**  $^1\text{H}$  NMR spectra of 3- Chlorobenzaldehyde.

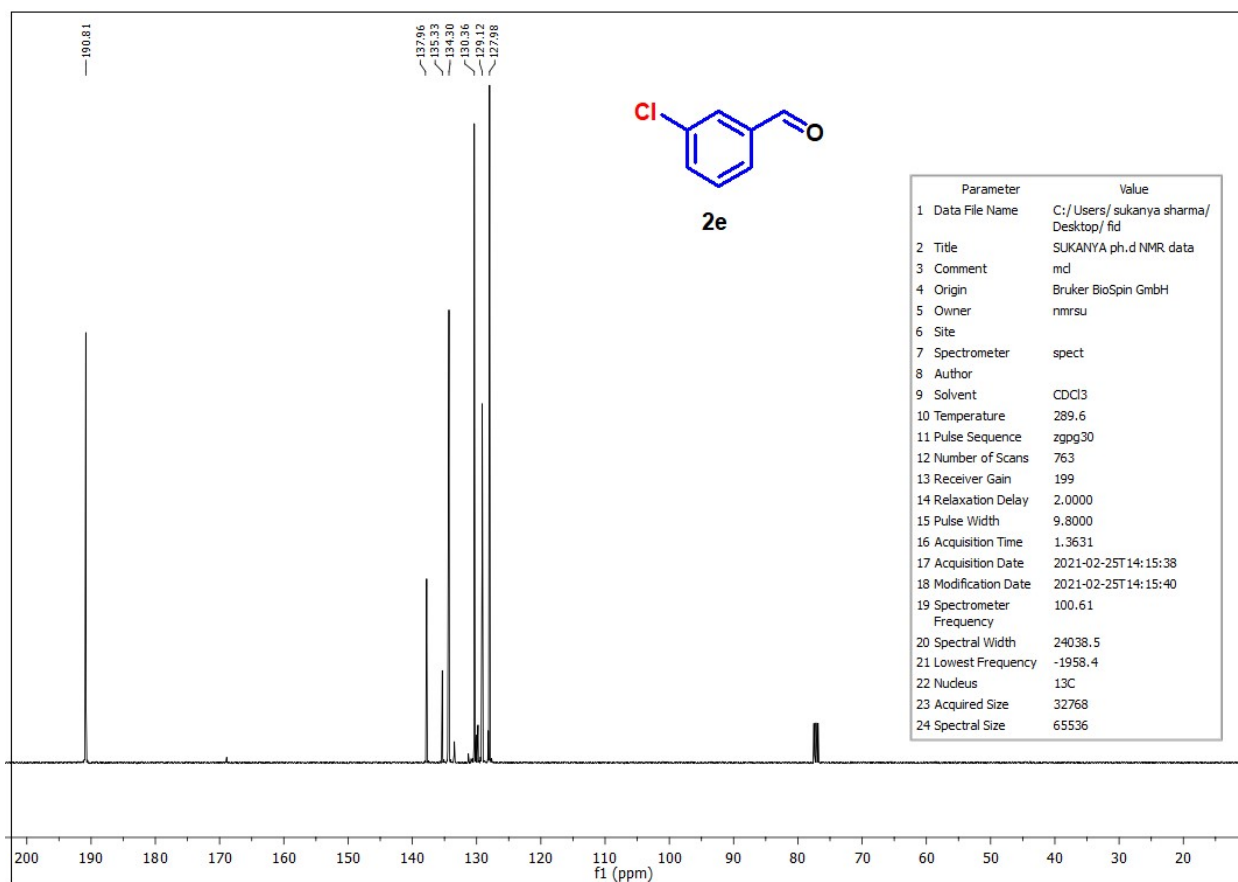

**Figure 10.**  $^{13}\text{C}$  NMR spectra of 3-Chlorobenzaldehyde.

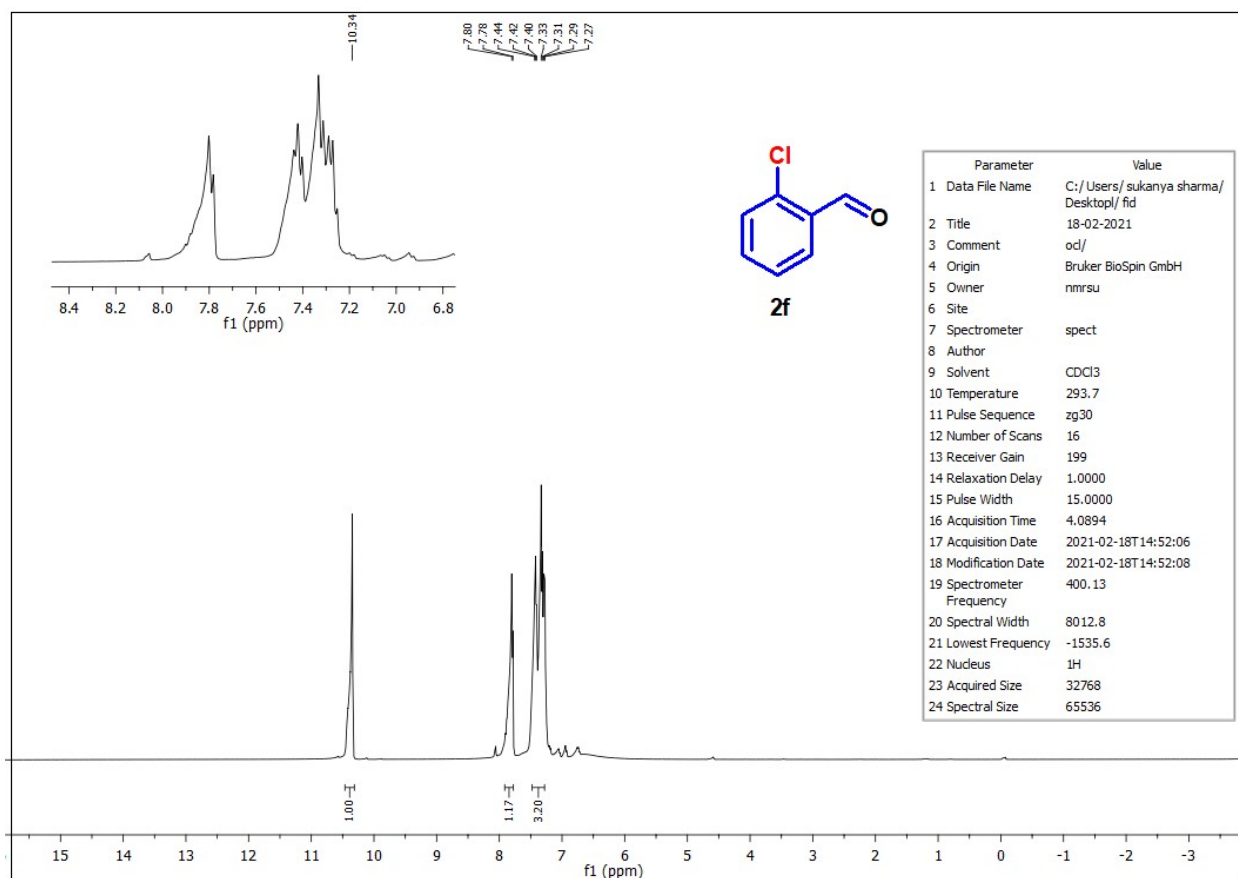

**Figure 11.** <sup>1</sup>H NMR spectra of 2-Chlorobenzaldehyde.

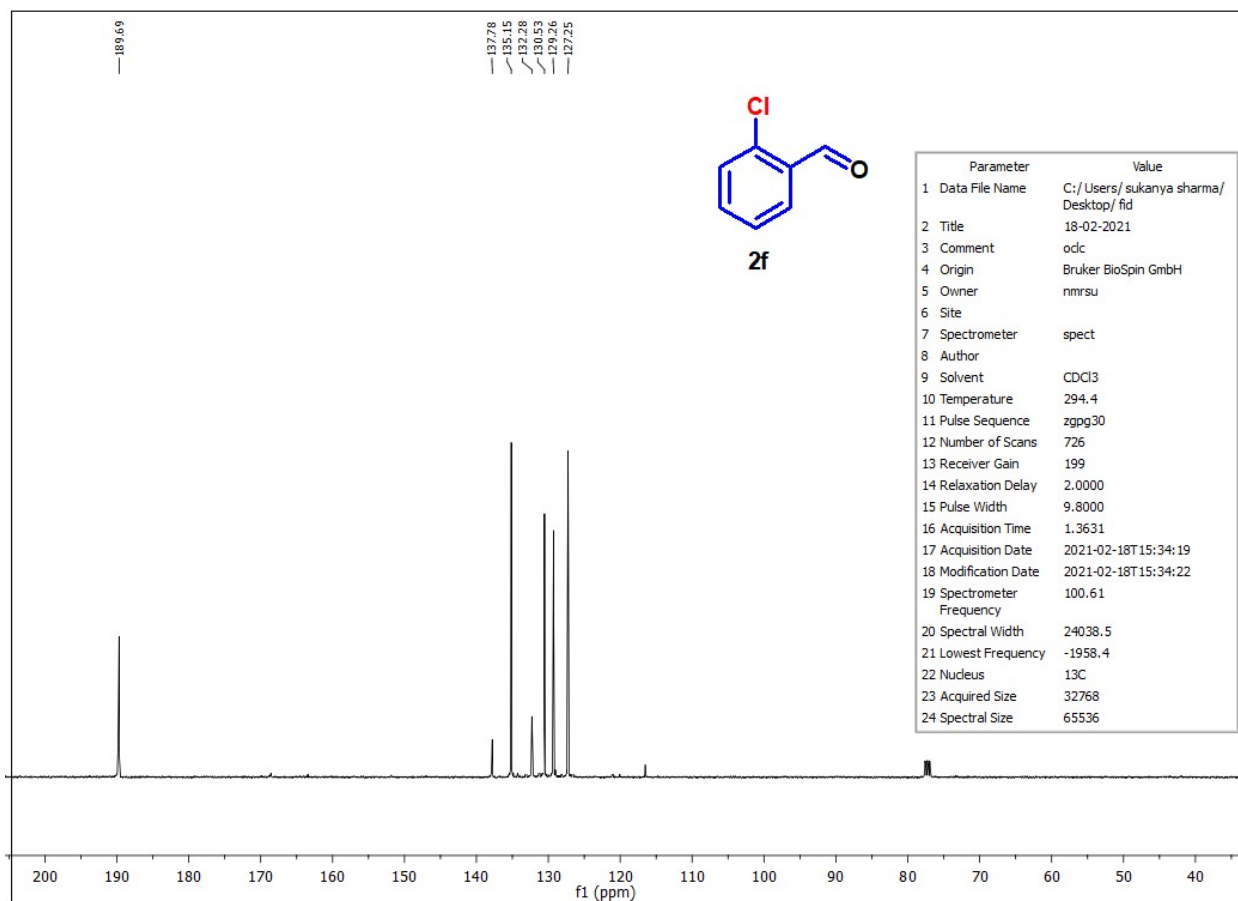

**Figure 12.**  $^{13}\text{C}$  NMR spectra of 2-Chlorobenzaldehyde.

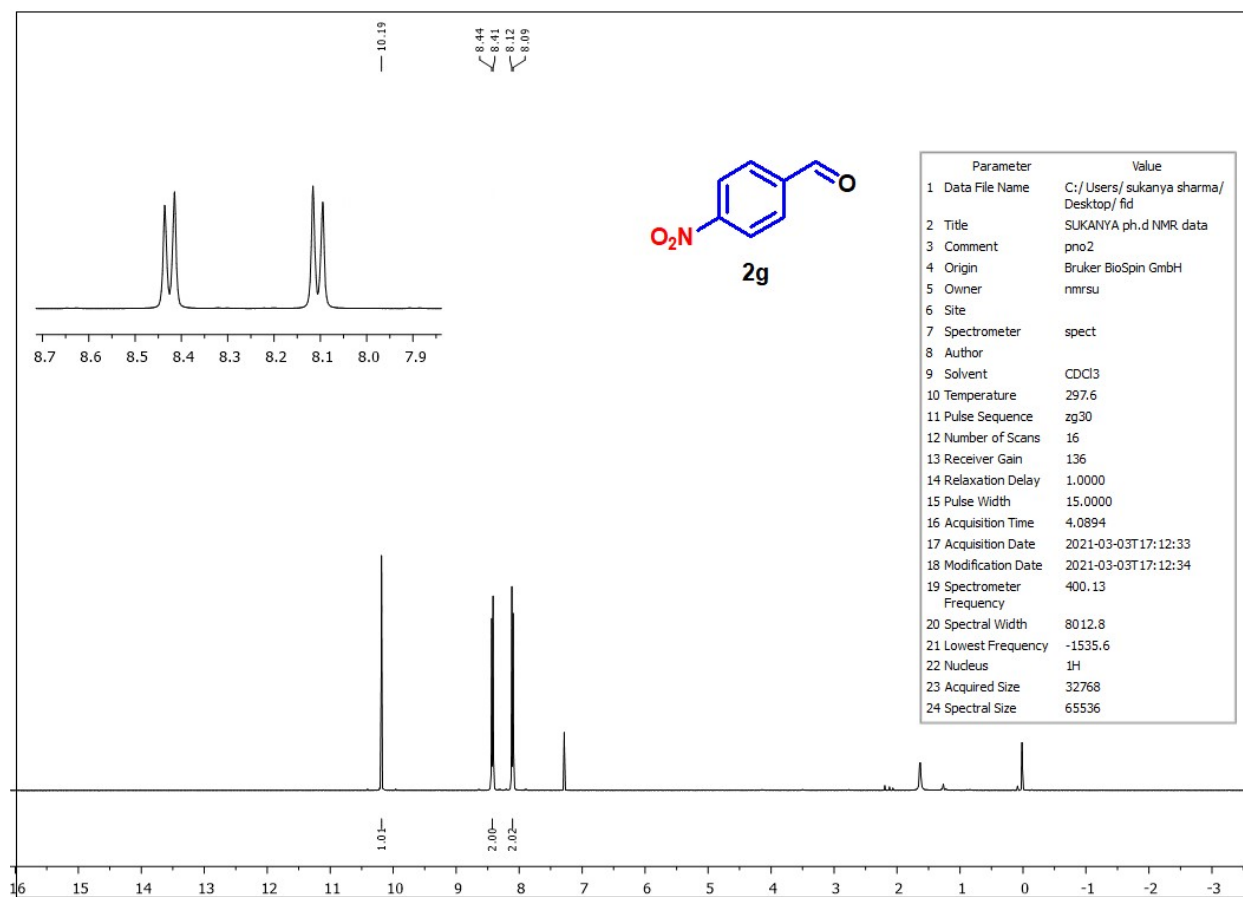

**Figure 13.** <sup>1</sup>H NMR spectra of 4-Nitrobenzaldehyde.



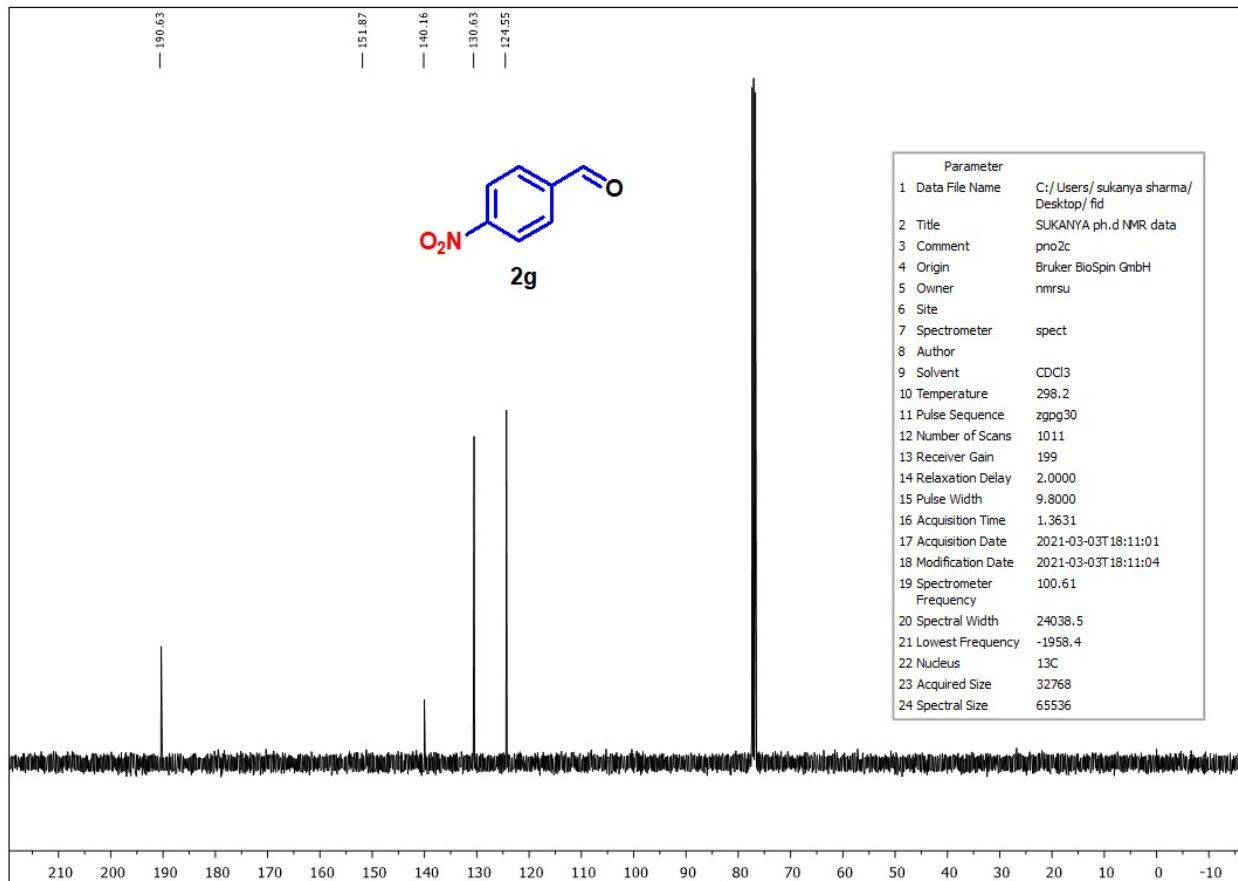

Figure 14. <sup>13</sup>C NMR spectra of 4-Nitrobenzaldehyde.

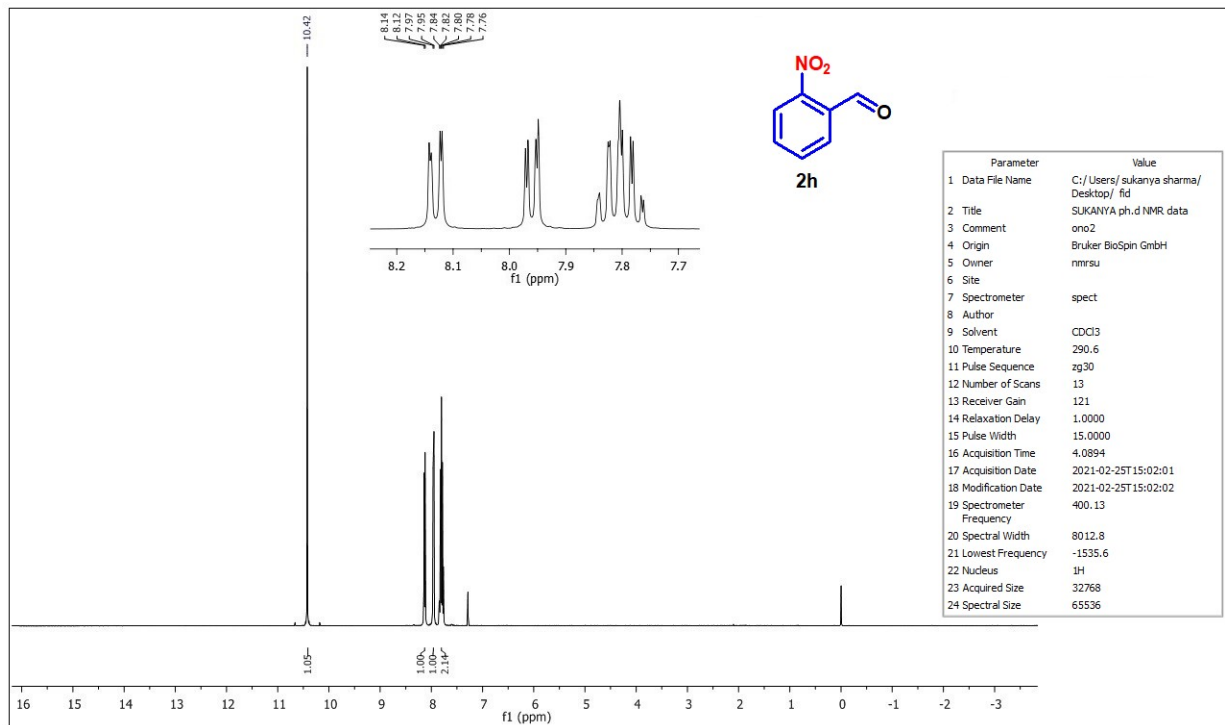

**Figure 15.** <sup>1</sup>H NMR spectra of 2-Nitrobenzaldehyde.

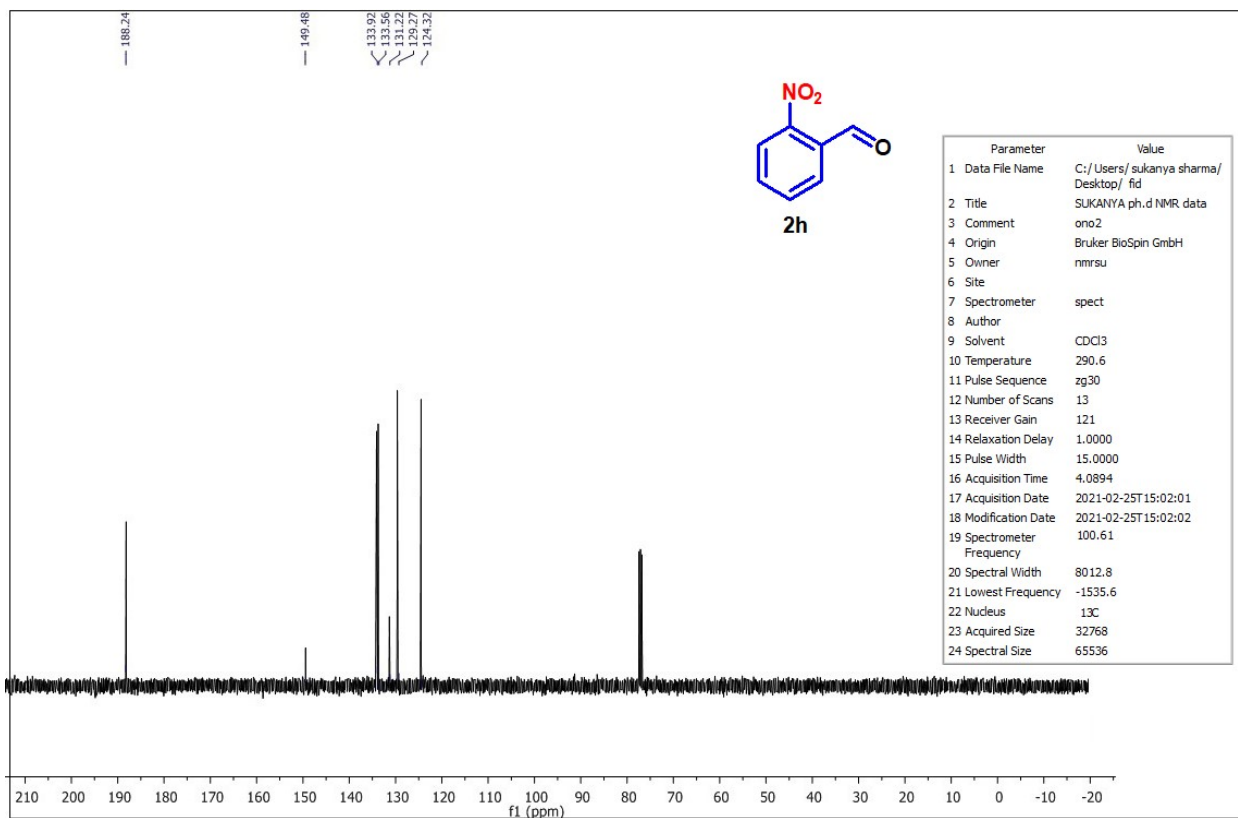

Figure 16.  $^{13}\text{C}$  NMR spectra of 2-Nitrobenzaldehyde.

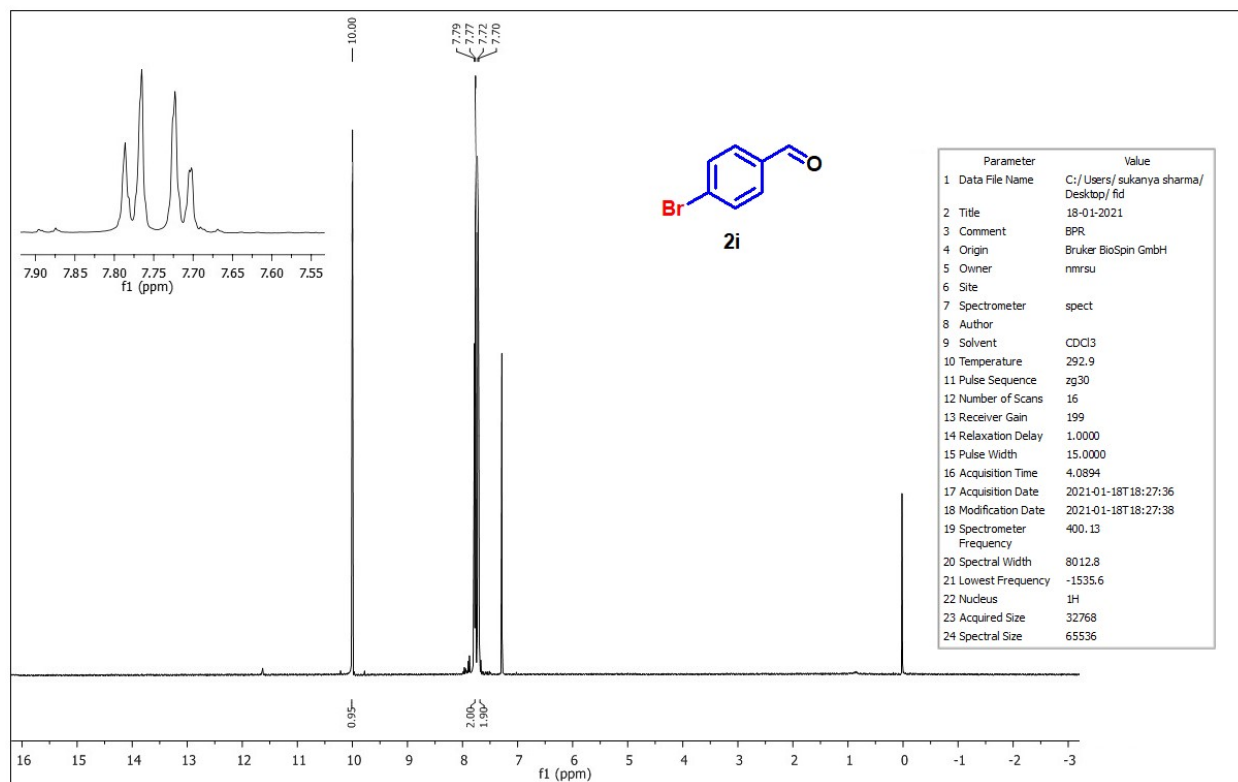

**Figure 17.** <sup>1</sup>H NMR spectra of 4-Bromobenzaldehyde.

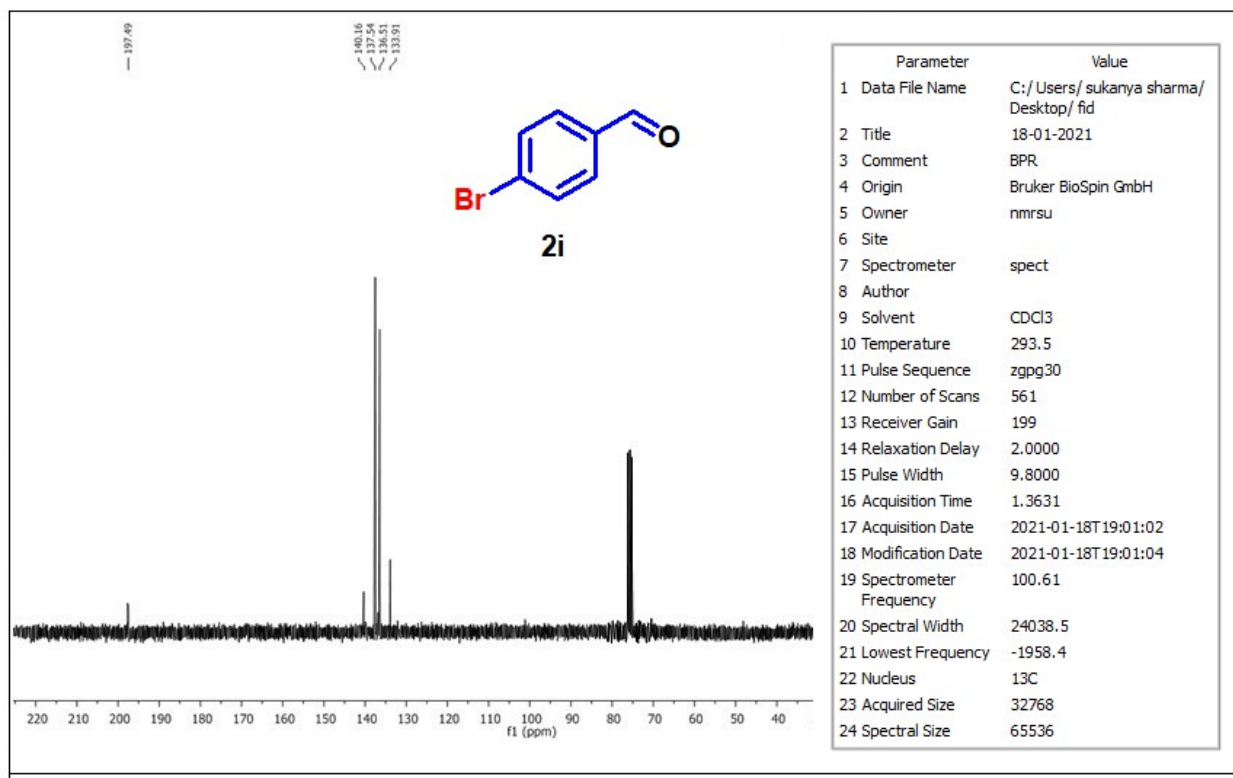

**Figure 18.** <sup>13</sup>C NMR spectra of 4-Bromobenzaldehyde.

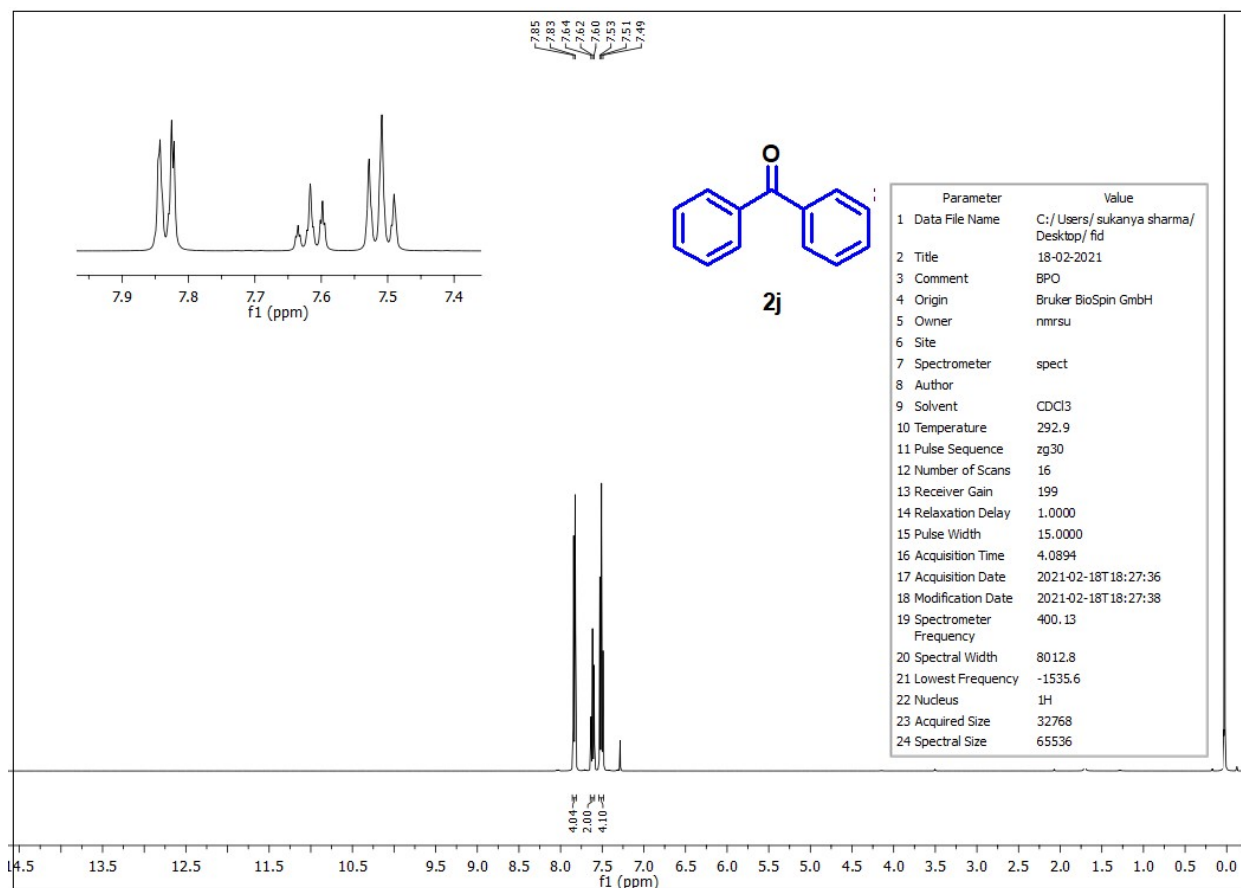

**Figure 19.** <sup>1</sup>H NMR spectra of benzophenone.

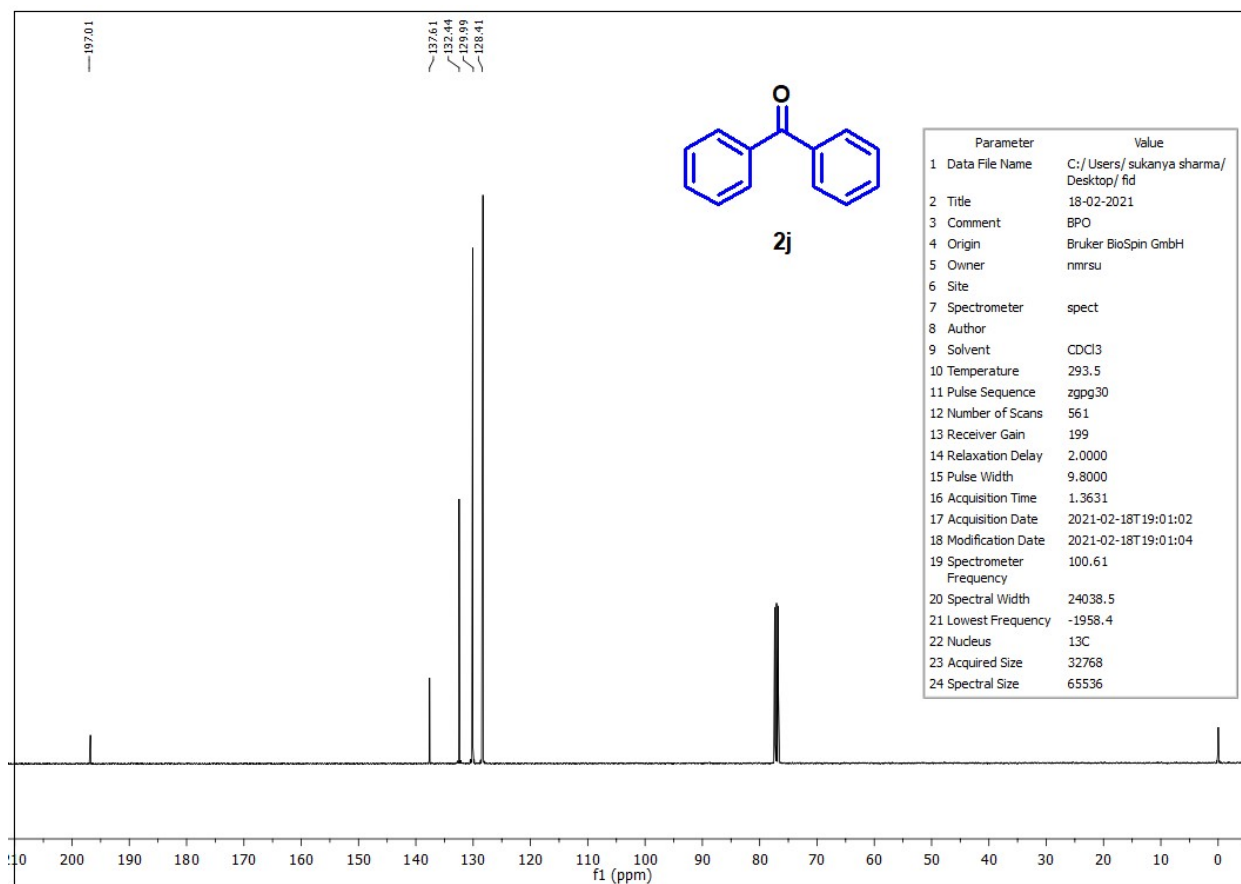

**Figure 20.**  $^{13}\text{C}$  NMR spectra of benzophenone.

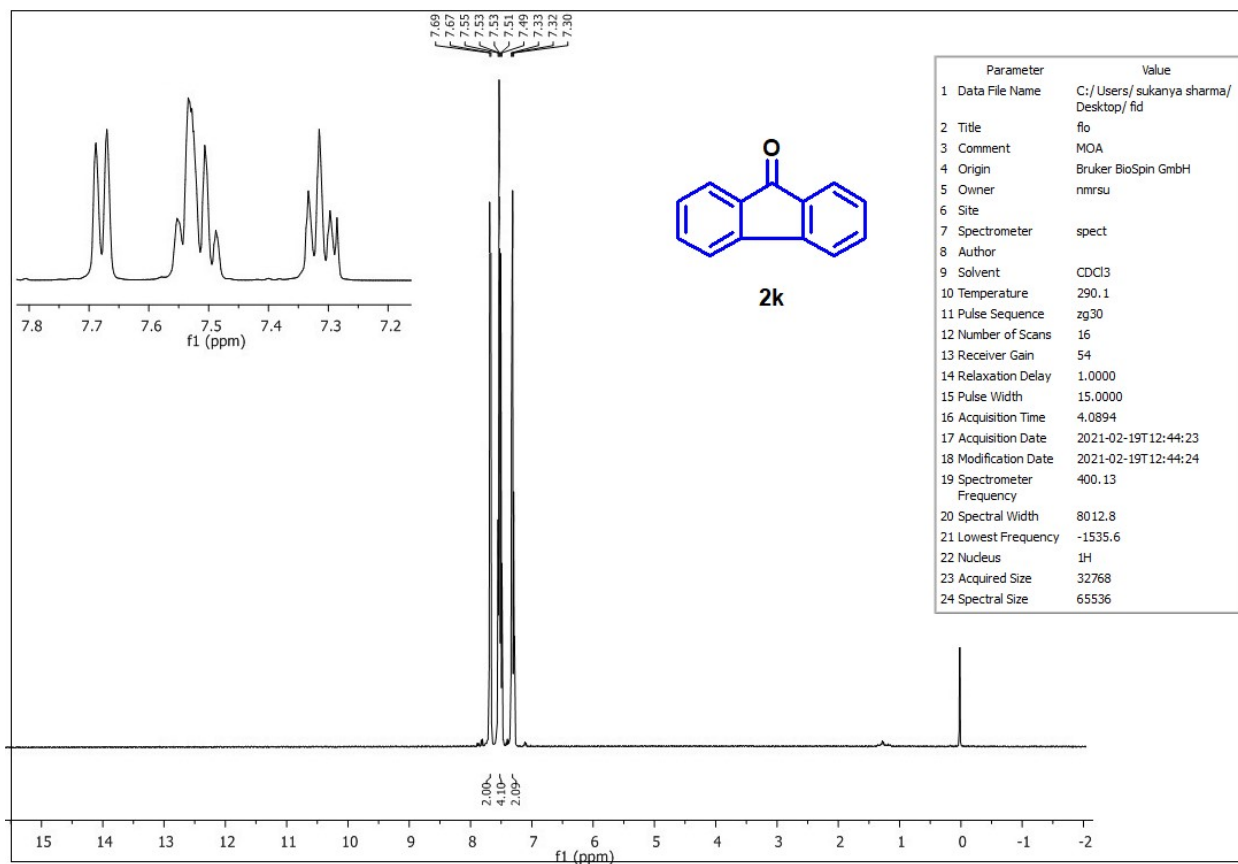

**Figure 21.** <sup>1</sup>H NMR spectra of fluorenone.



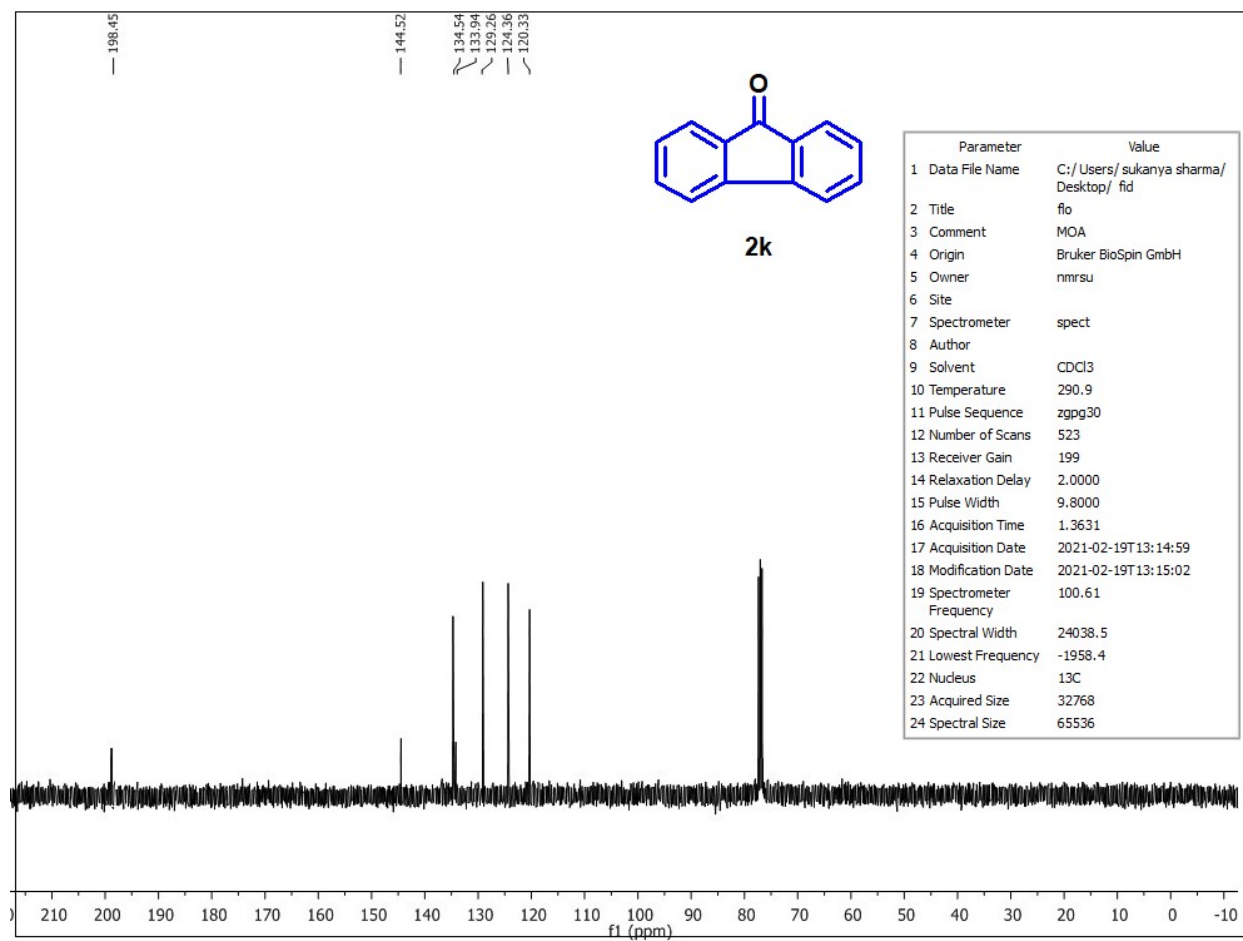

**Figure 22.**  $^{13}\text{C}$  NMR spectra of fluorenone.

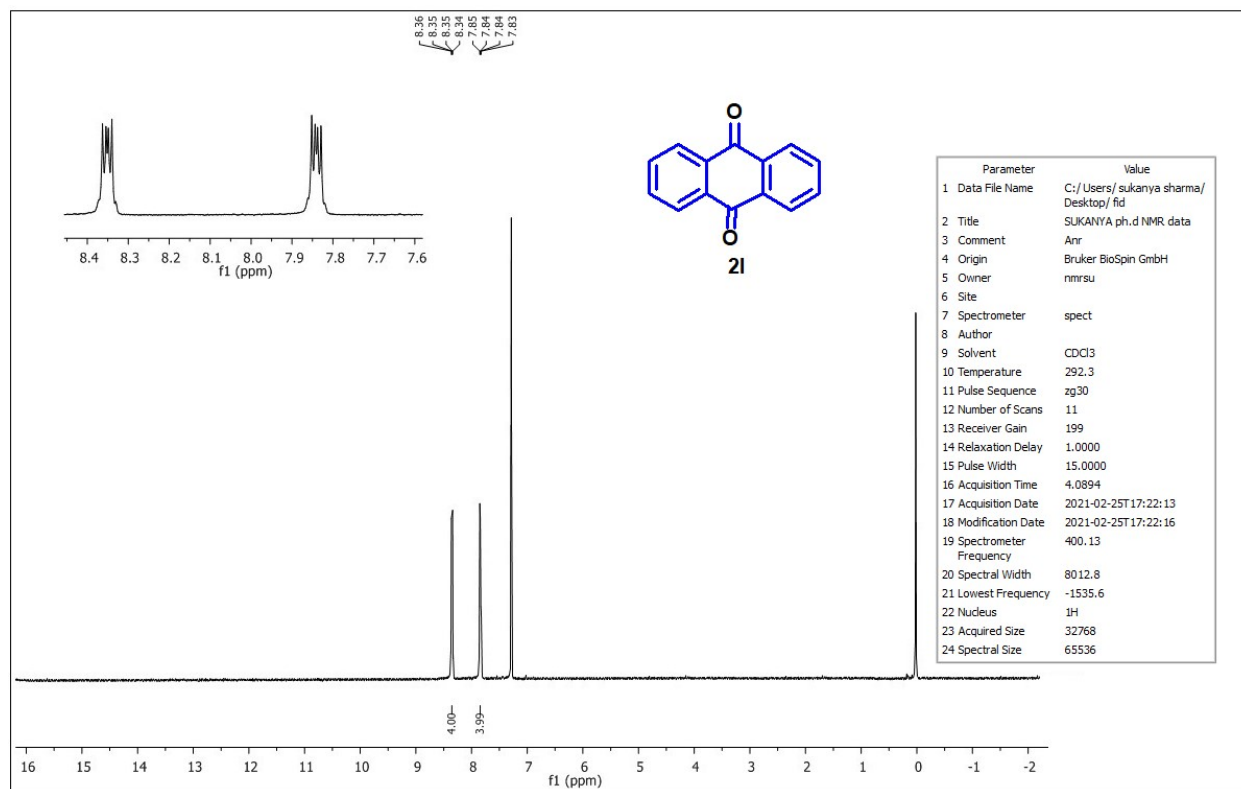

**Figure 23.** <sup>1</sup>H NMR spectra of anthraquinone.

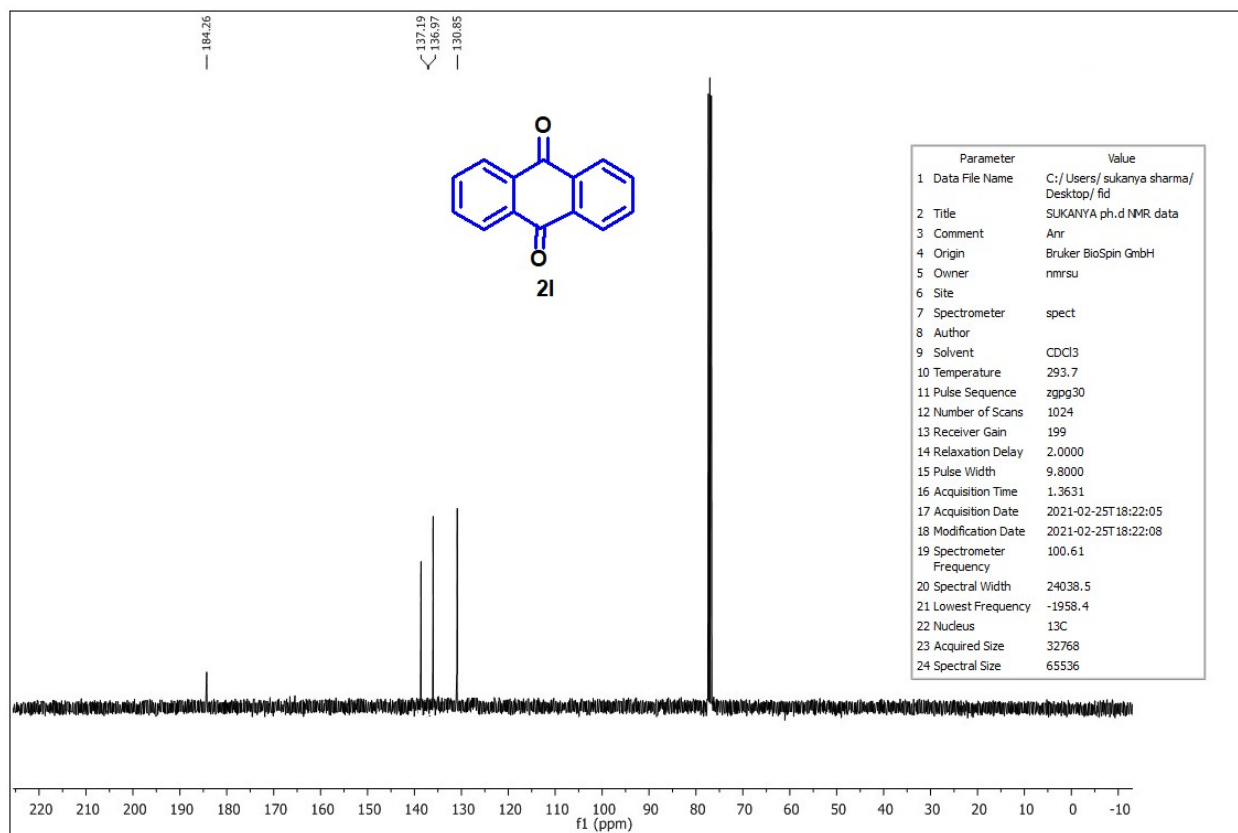

**Figure 24.**  $^{13}\text{C}$  NMR spectra of anthraquinone.

S5. <sup>1</sup>H NMR and <sup>13</sup>C NMR spectra of compounds listed in Table 5

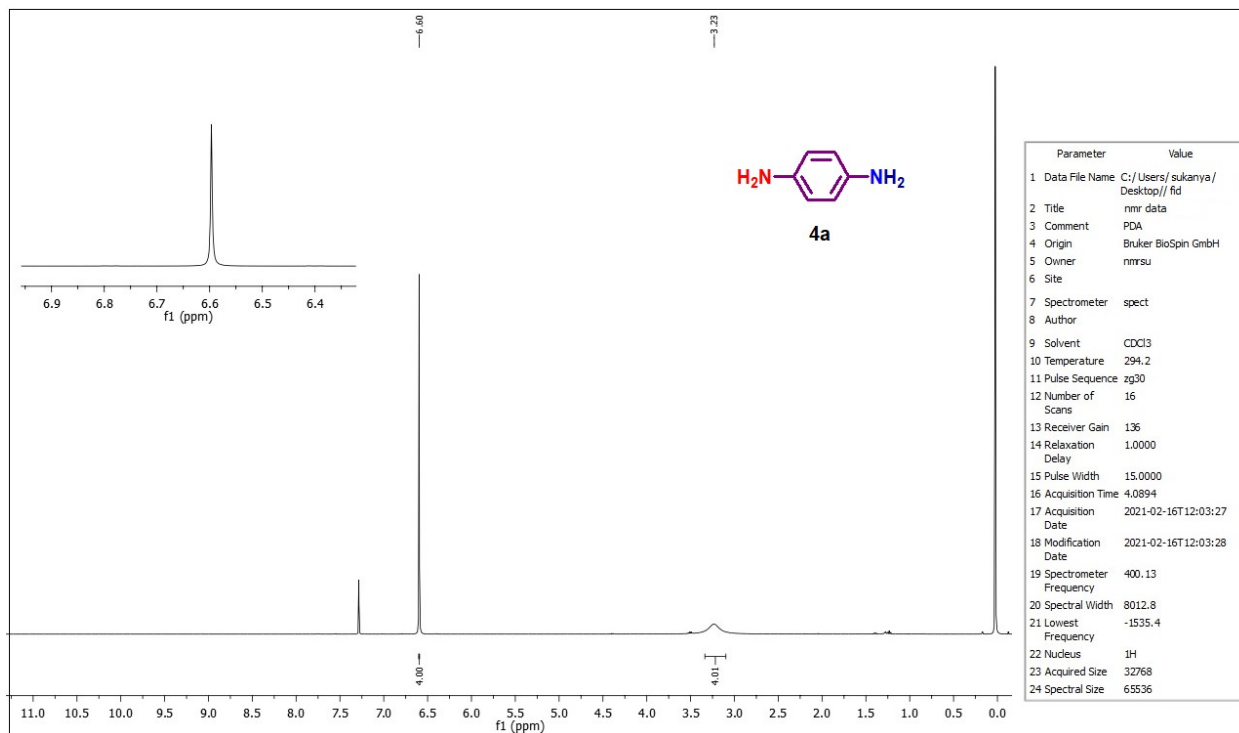

Figure 25. <sup>1</sup>H NMR spectra of 1,4-diaminobenzene.

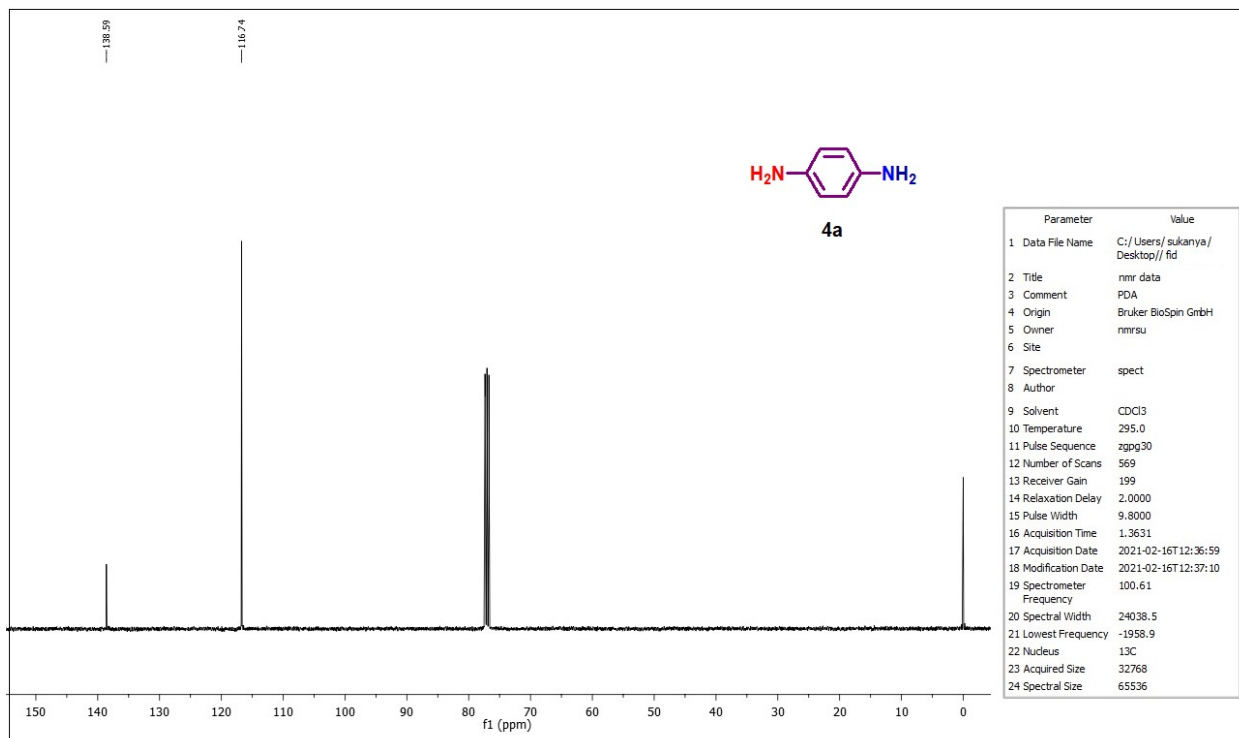

Figure 26. <sup>13</sup>C NMR spectra of 1,4-diaminobenzene.

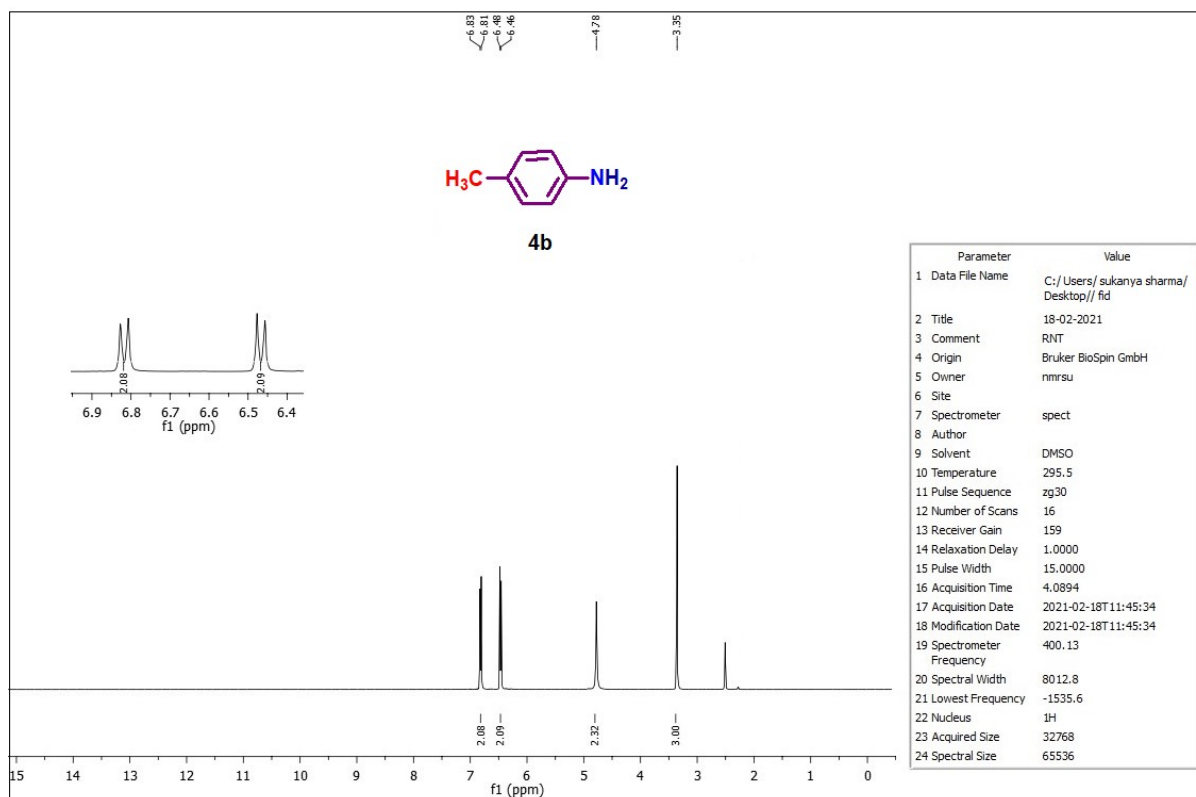

Figure 27. <sup>1</sup>H NMR spectra of 4-methylaniline.

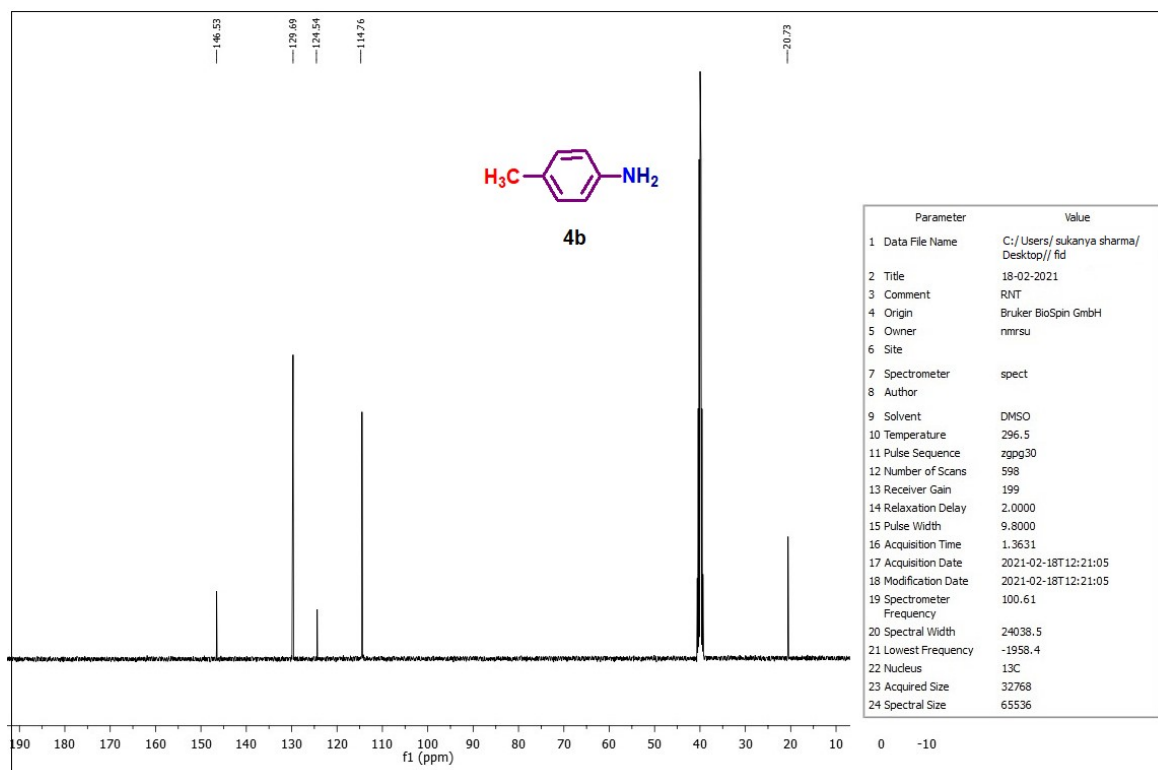

Figure 28. <sup>13</sup>C NMR spectra of 4-methylaniline

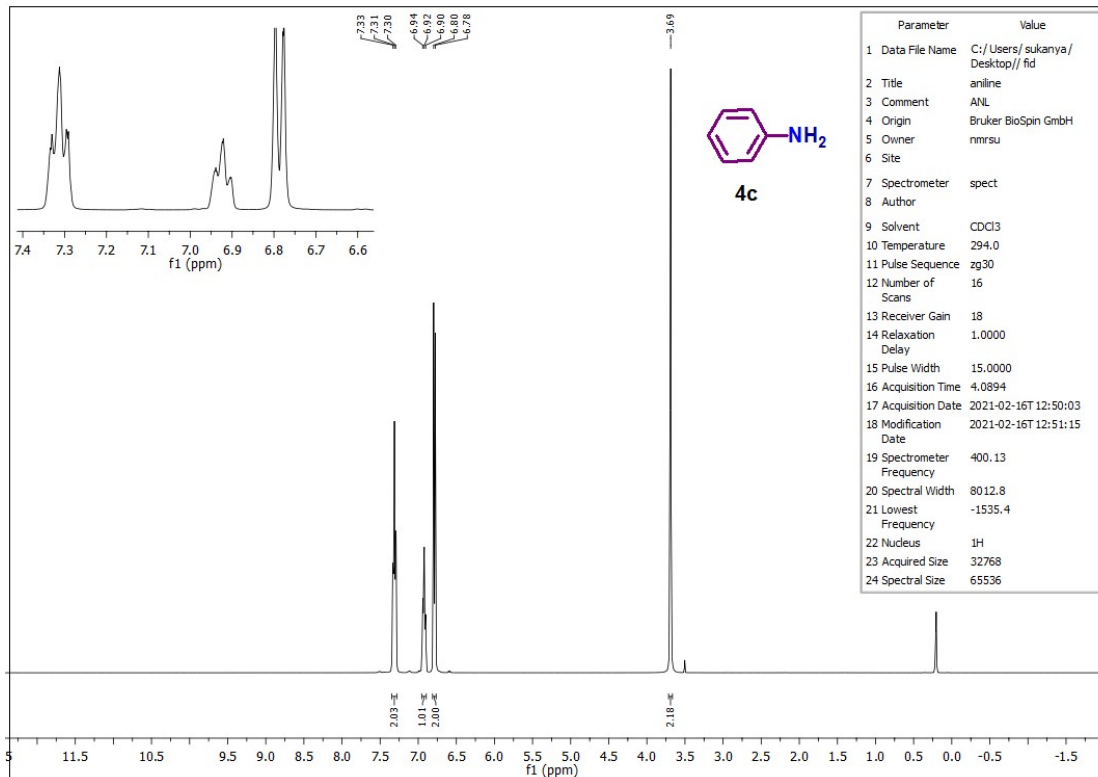

Figure 29. <sup>1</sup>H NMR spectra of aniline.

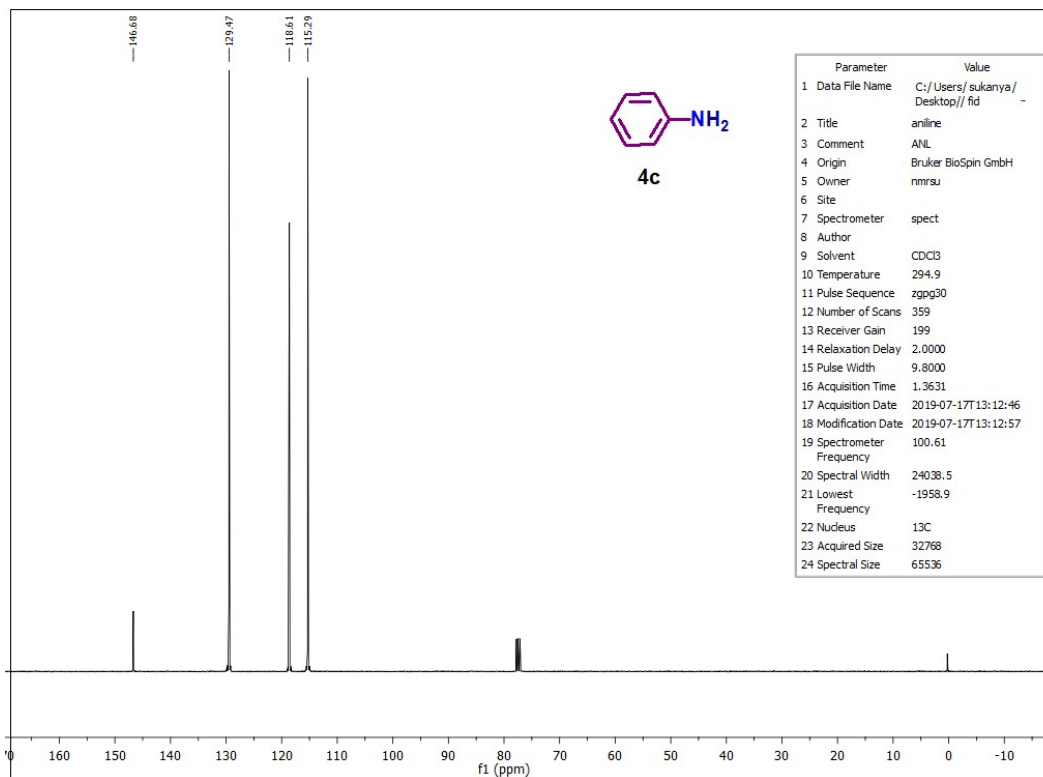

Figure 30. <sup>13</sup>C NMR spectra of aniline.

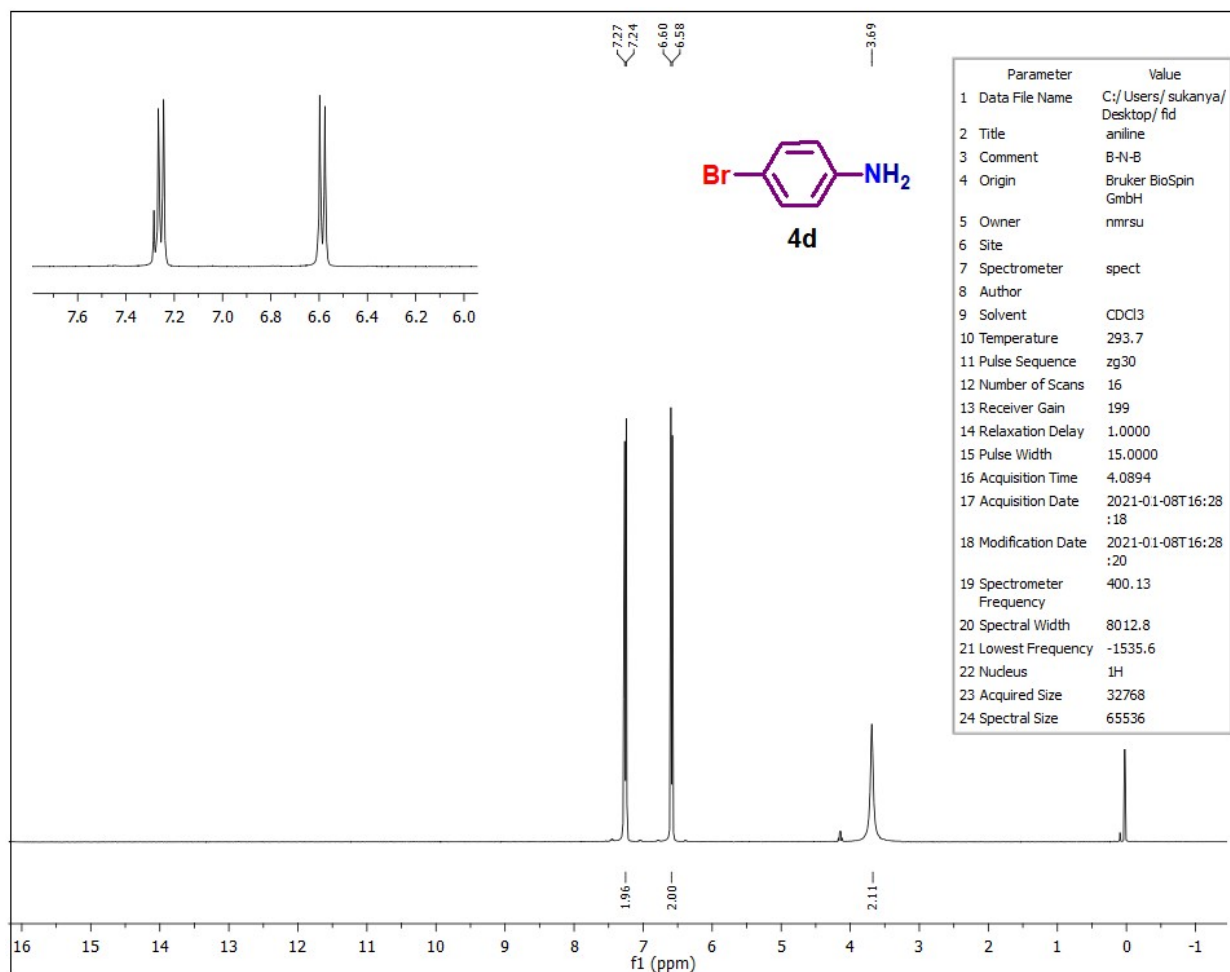

**Figure 31.** <sup>1</sup>H NMR spectra of 4-bromoaniline.

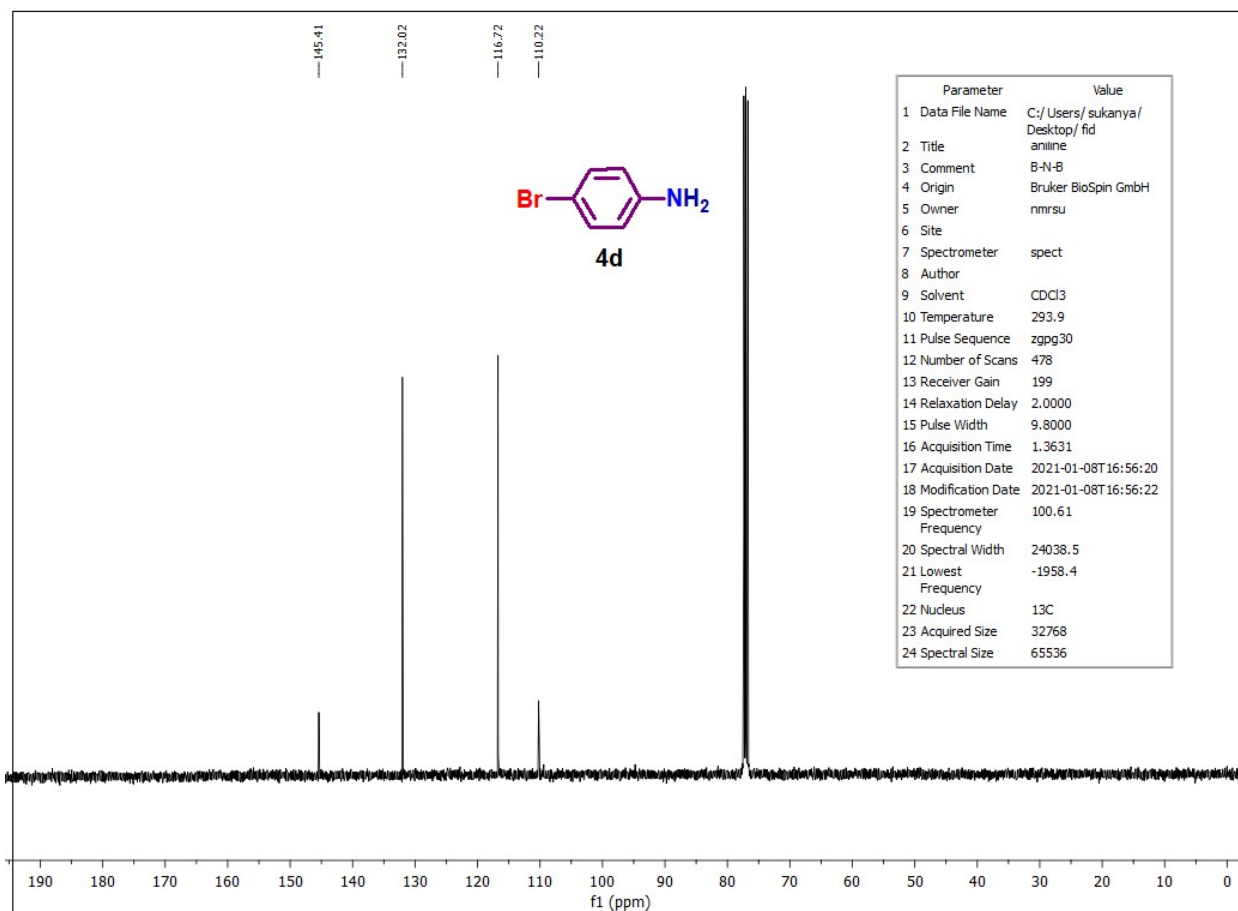

**Figure 32.**  $^{13}\text{C}$  NMR spectra of 4-bromoaniline.



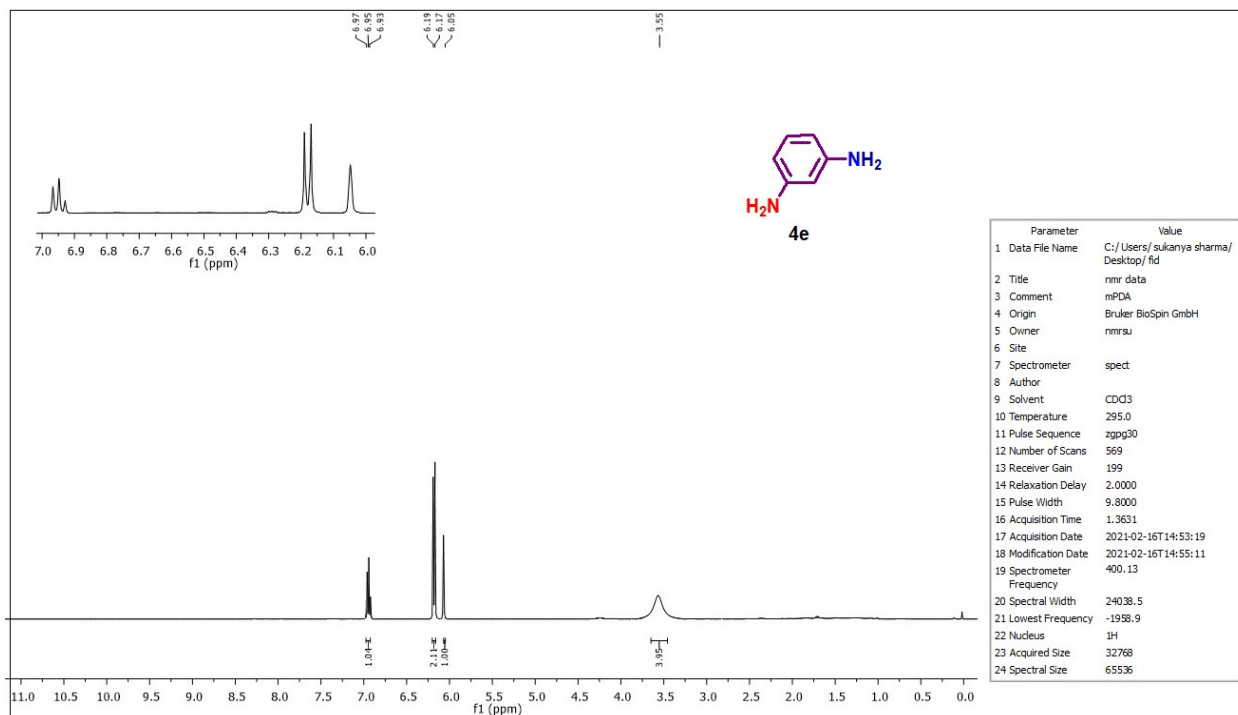

Figure 33.  $^1\text{H}$  NMR spectra of 1,3-diaminobenzene.

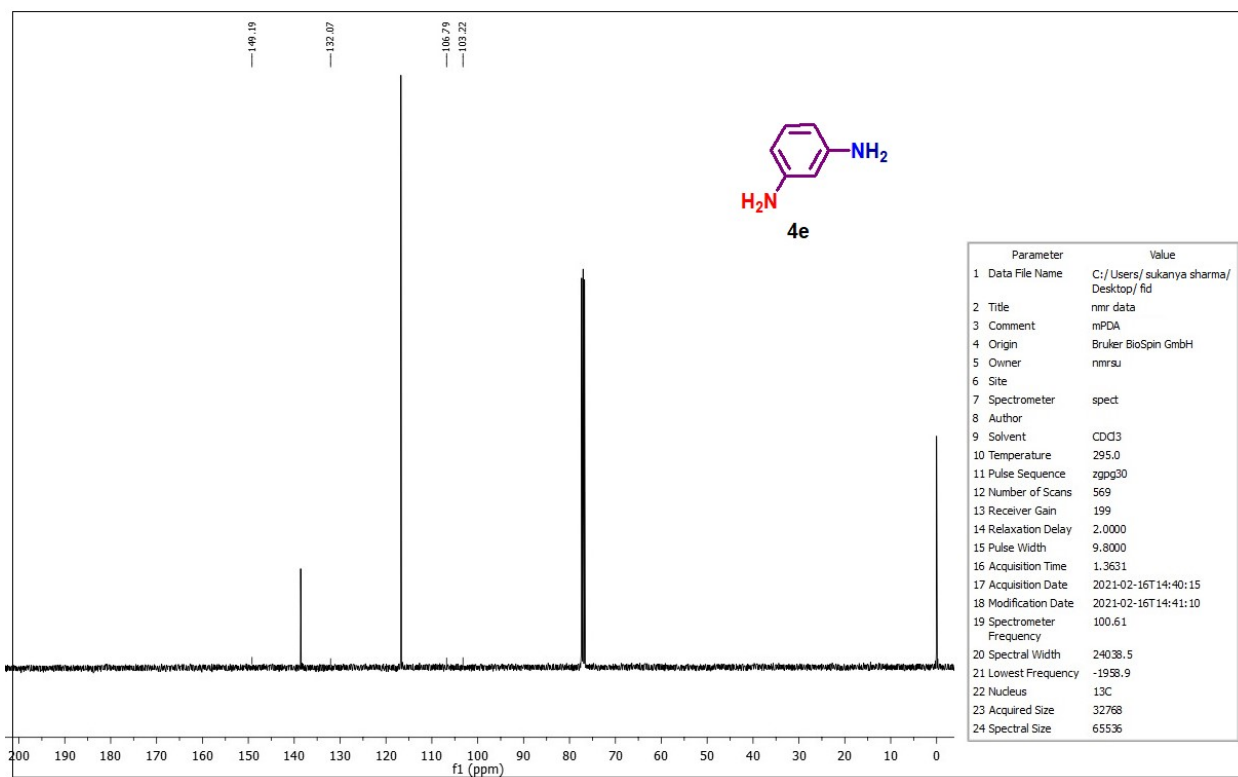

Figure 34.  $^{13}\text{C}$  NMR spectra of 1,3-diaminobenzene.

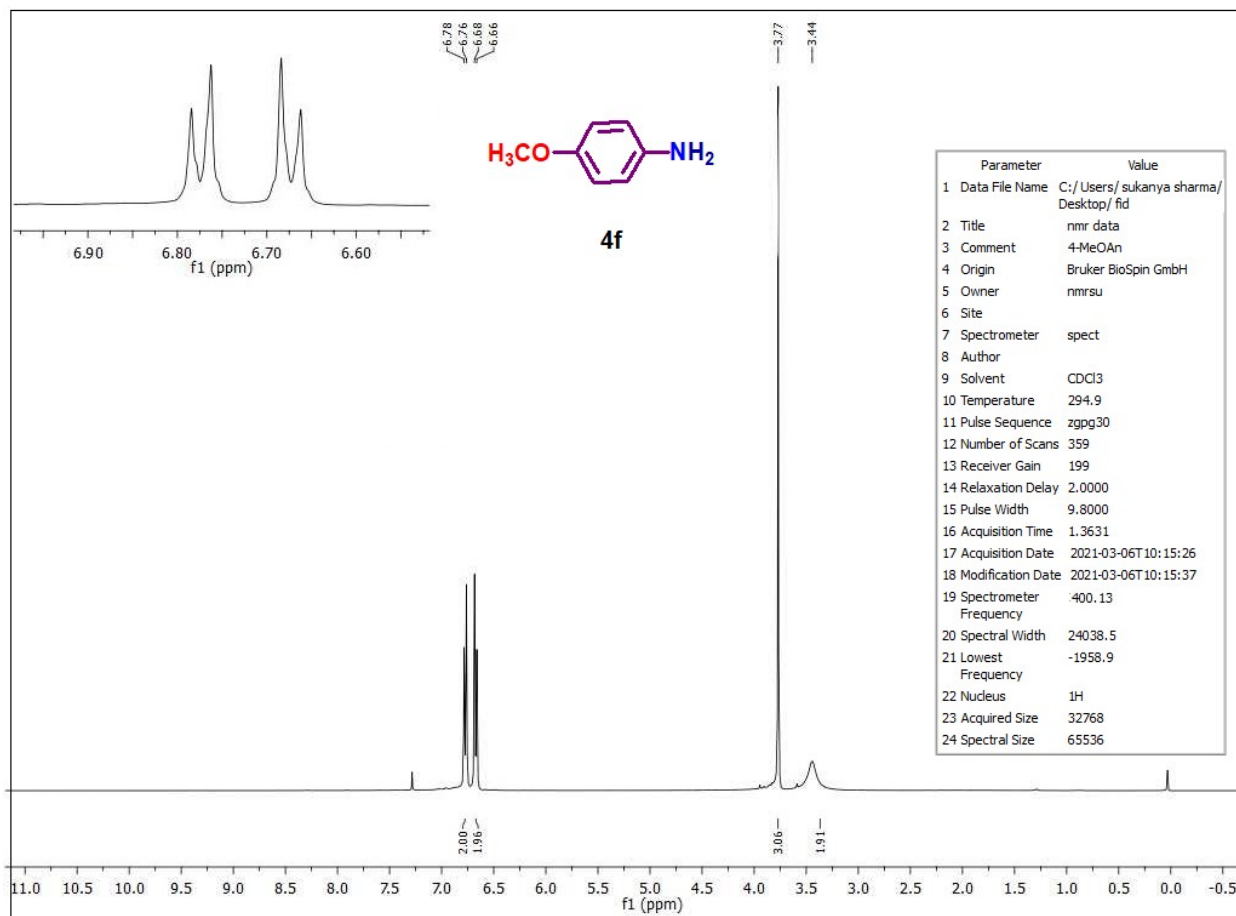

**Figure 35.** <sup>1</sup>H NMR spectra of 4-methoxyaniline.

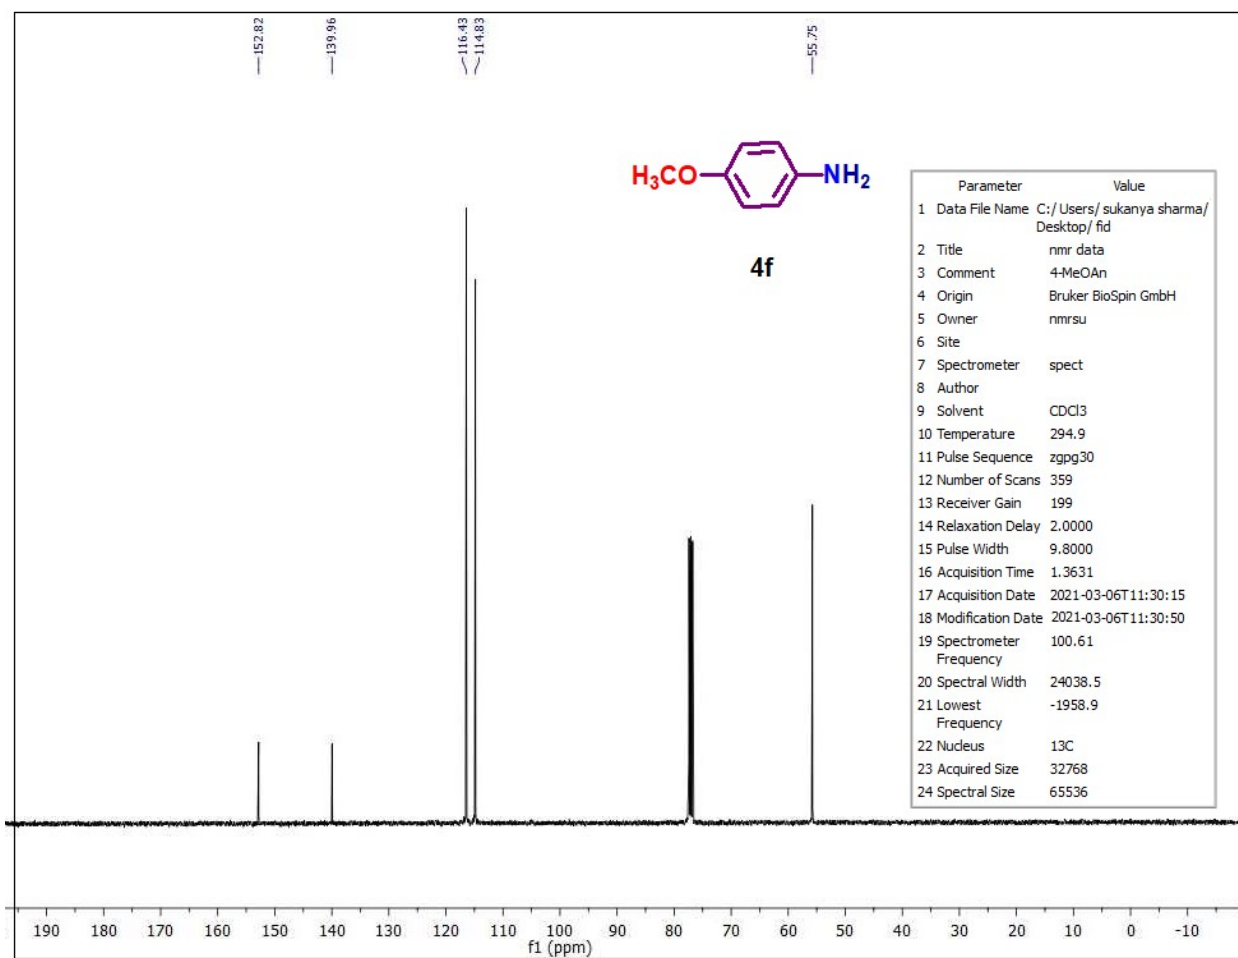

**Figure 36.**  $^{13}\text{C}$  NMR spectra of 4-methoxyaniline.

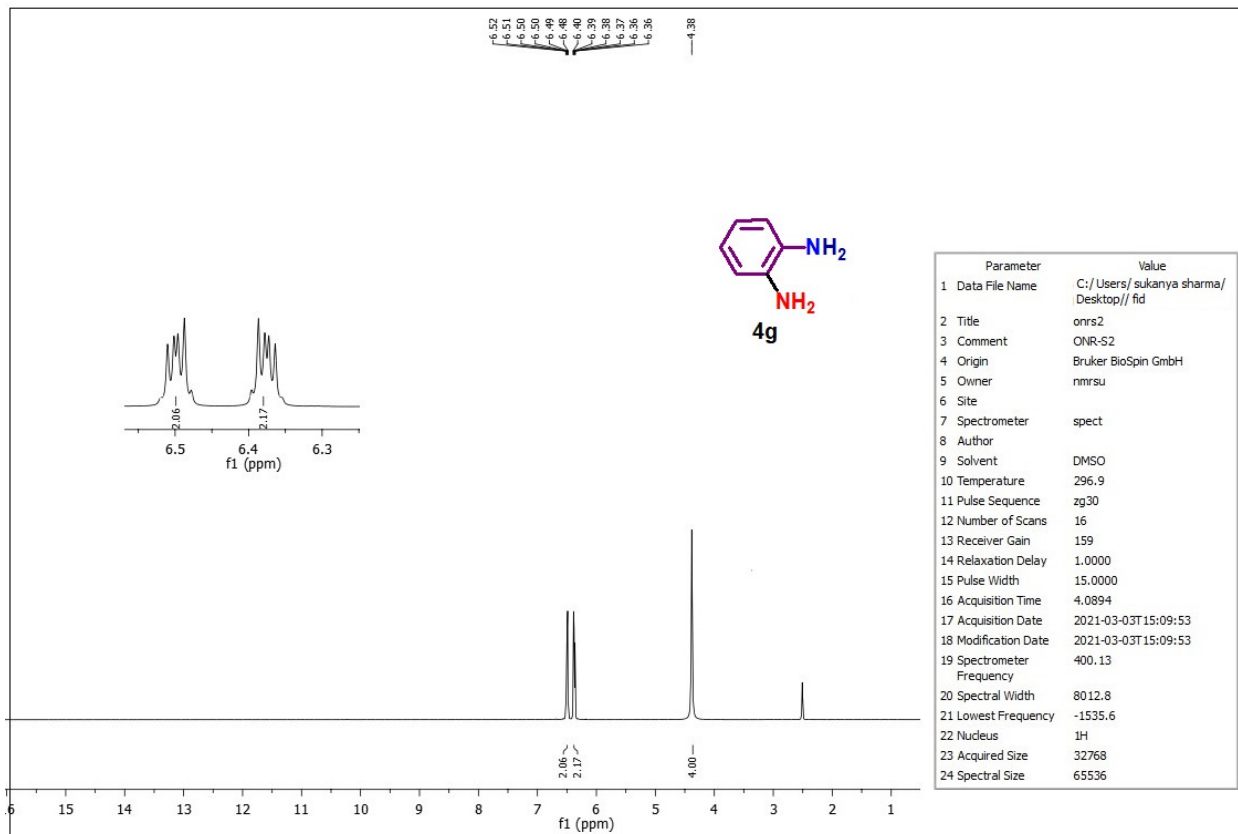

Figure 37. <sup>1</sup>H NMR spectra of 1,2-diaminobenzene.

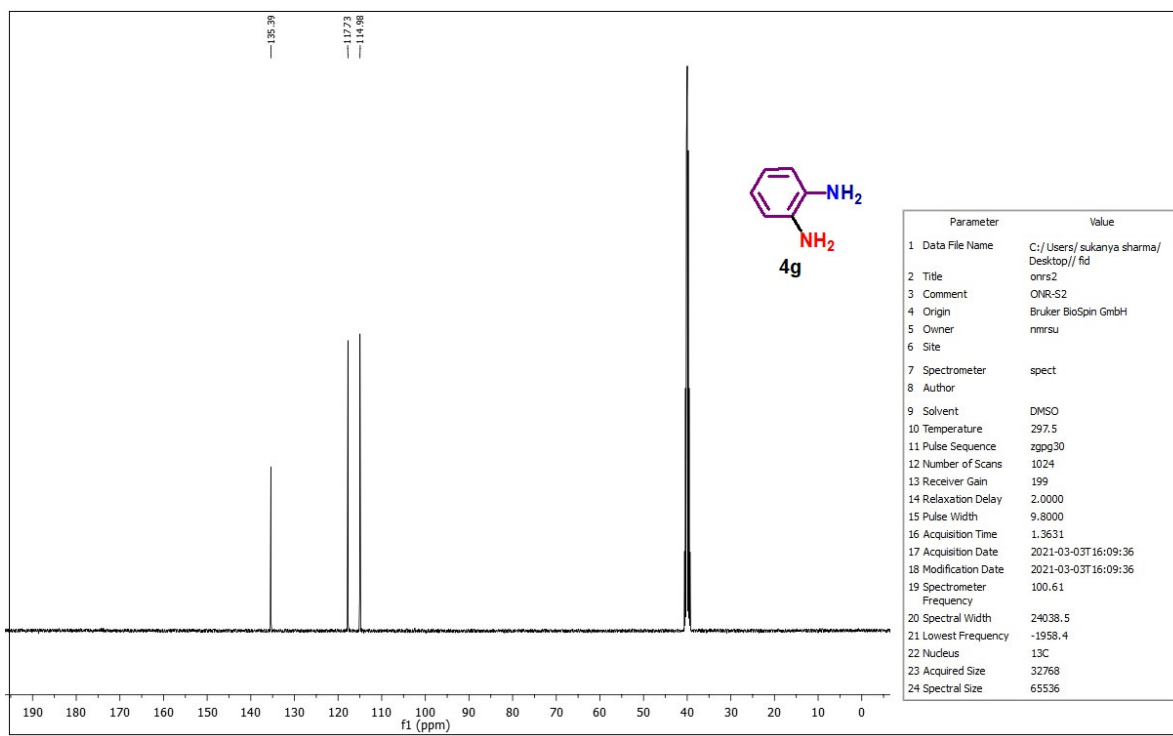

Fig

Figure 38. <sup>13</sup>C NMR spectra of 1,2-diaminobenzene

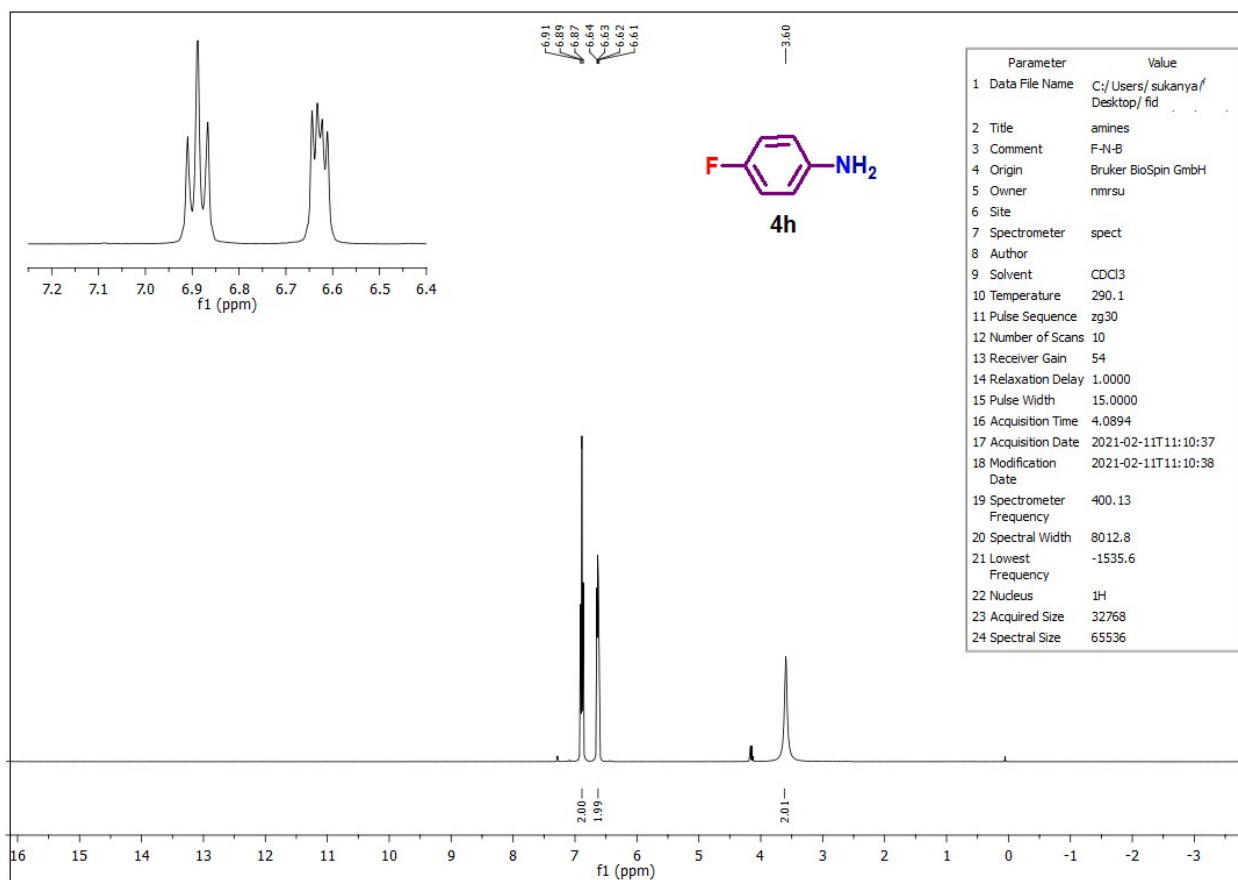

**Figure 39.** <sup>1</sup>H NMR spectra of 4-fluoroaniline.

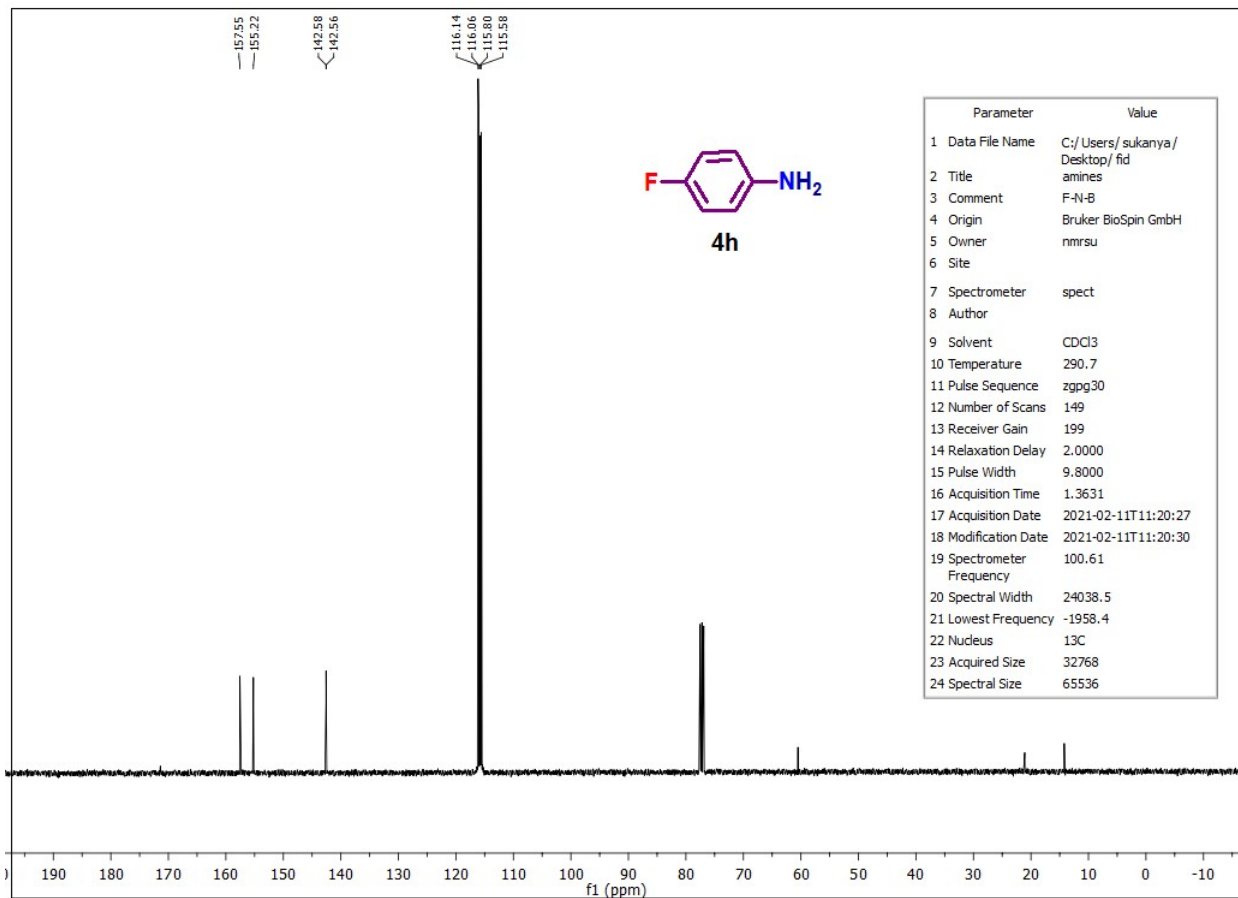

**Figure 40.**  $^{13}\text{C}$  NMR spectra of 4-fluoroaniline.

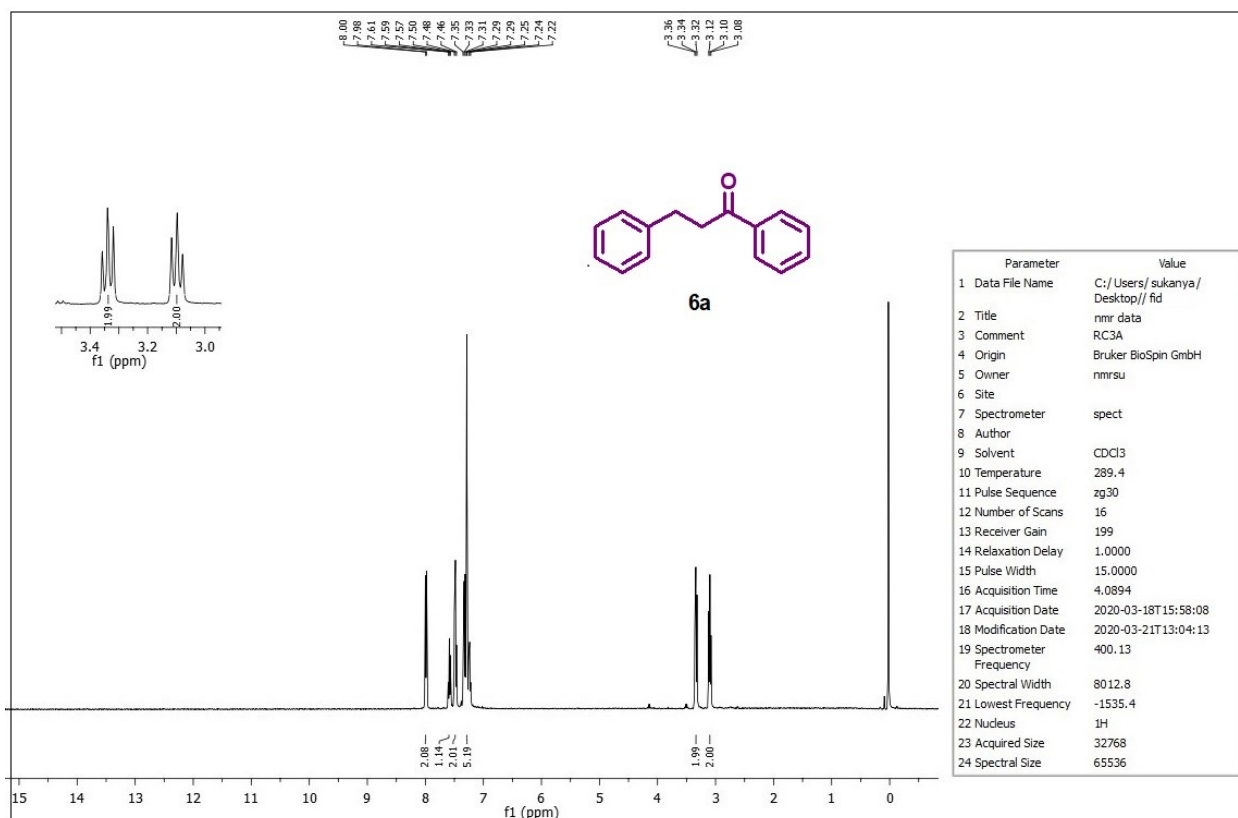

Figure 41. <sup>1</sup>H NMR spectra of 1,3-diphenylpropan-1-one.

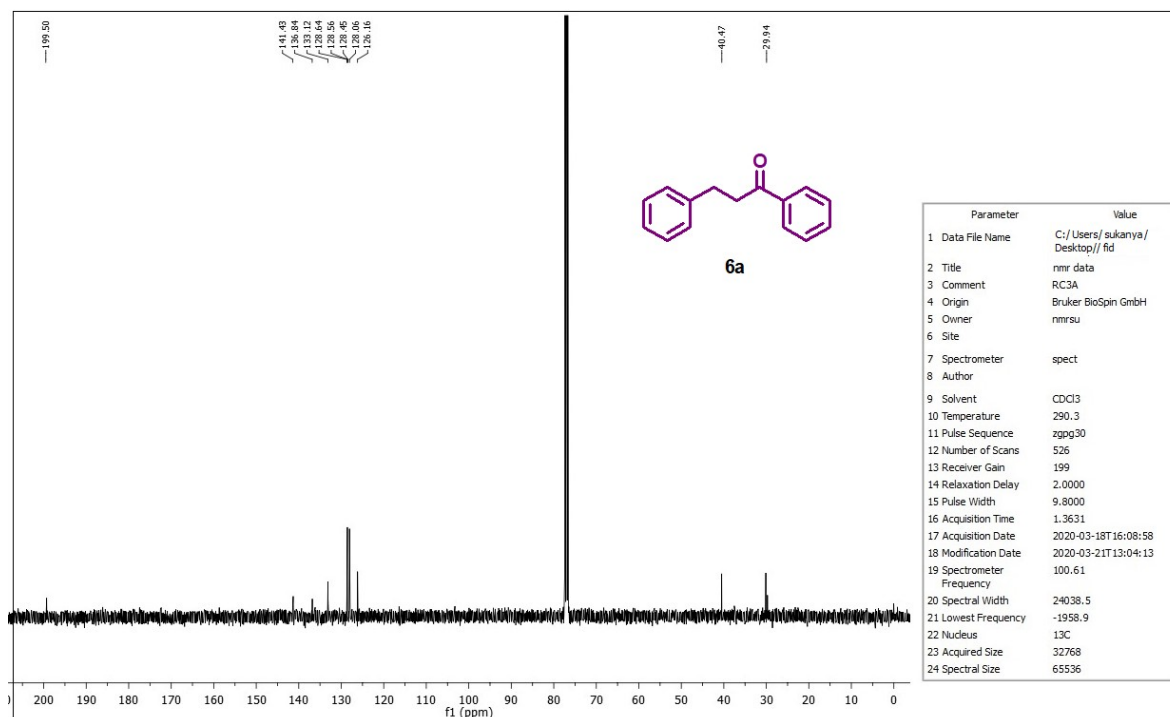

Figure 42. <sup>13</sup>C NMR spectra of 1,3-diphenylpropan-1-one.

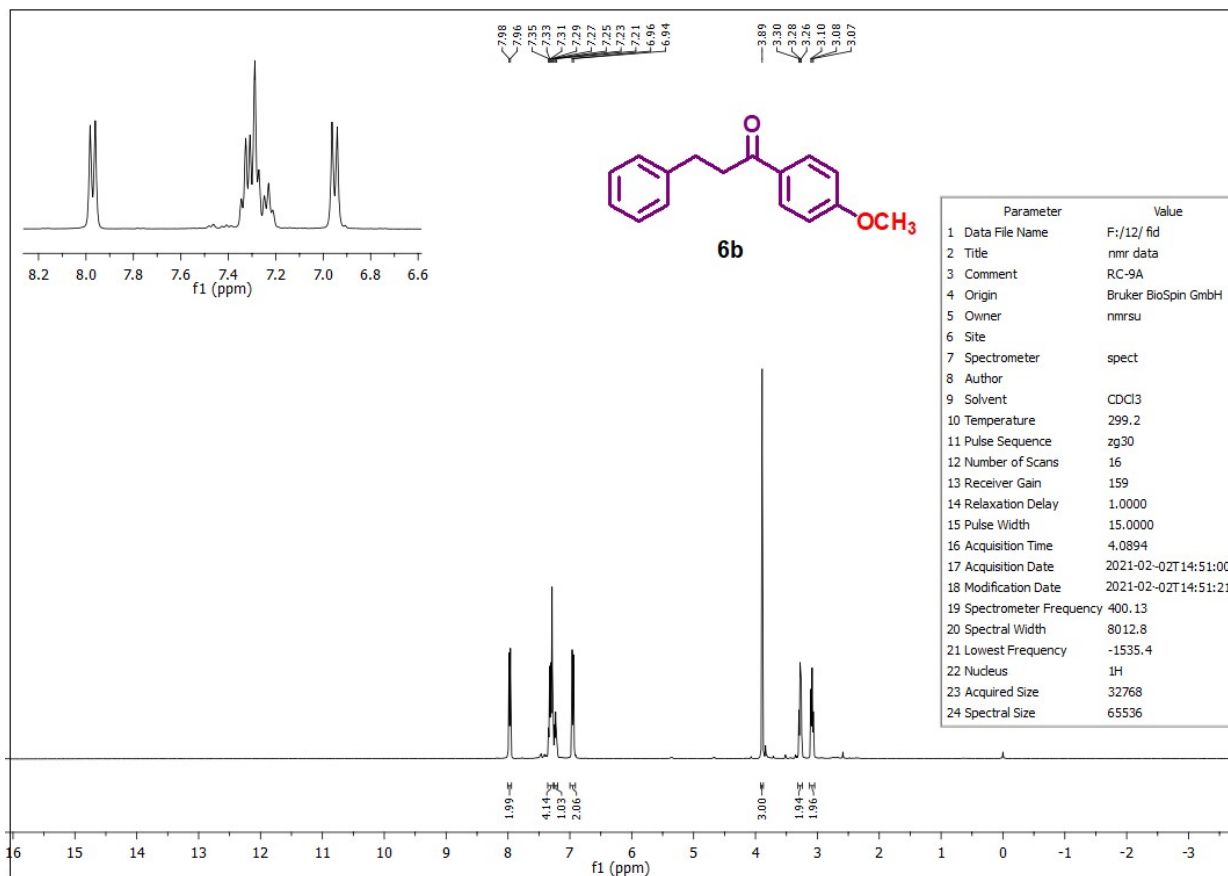

**Figure 43.**  $^1\text{H}$  NMR spectra of 1-(4-methoxyphenyl)-3-phenylpropan-1-one.



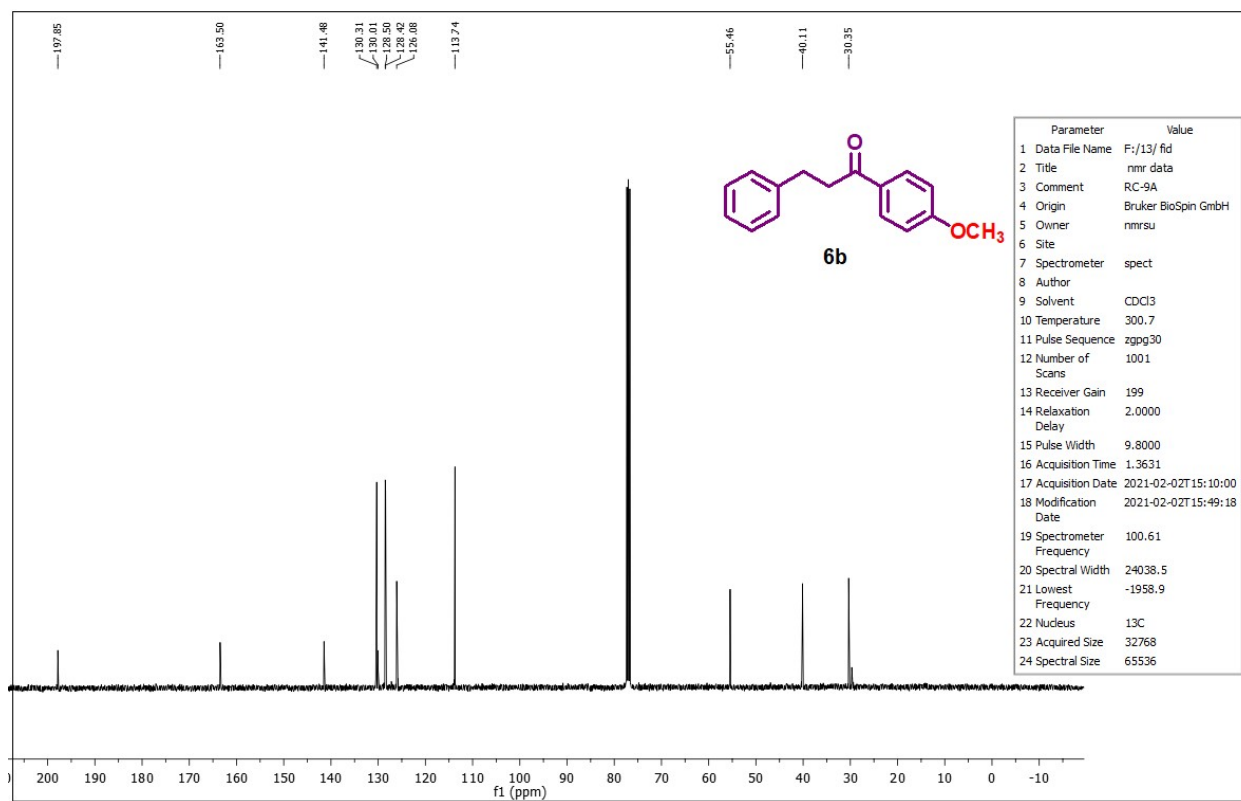

**Figure 44.**  $^{13}\text{C}$  NMR spectra of 1-(4-methoxyphenyl)-3-phenylpropan-1-one.

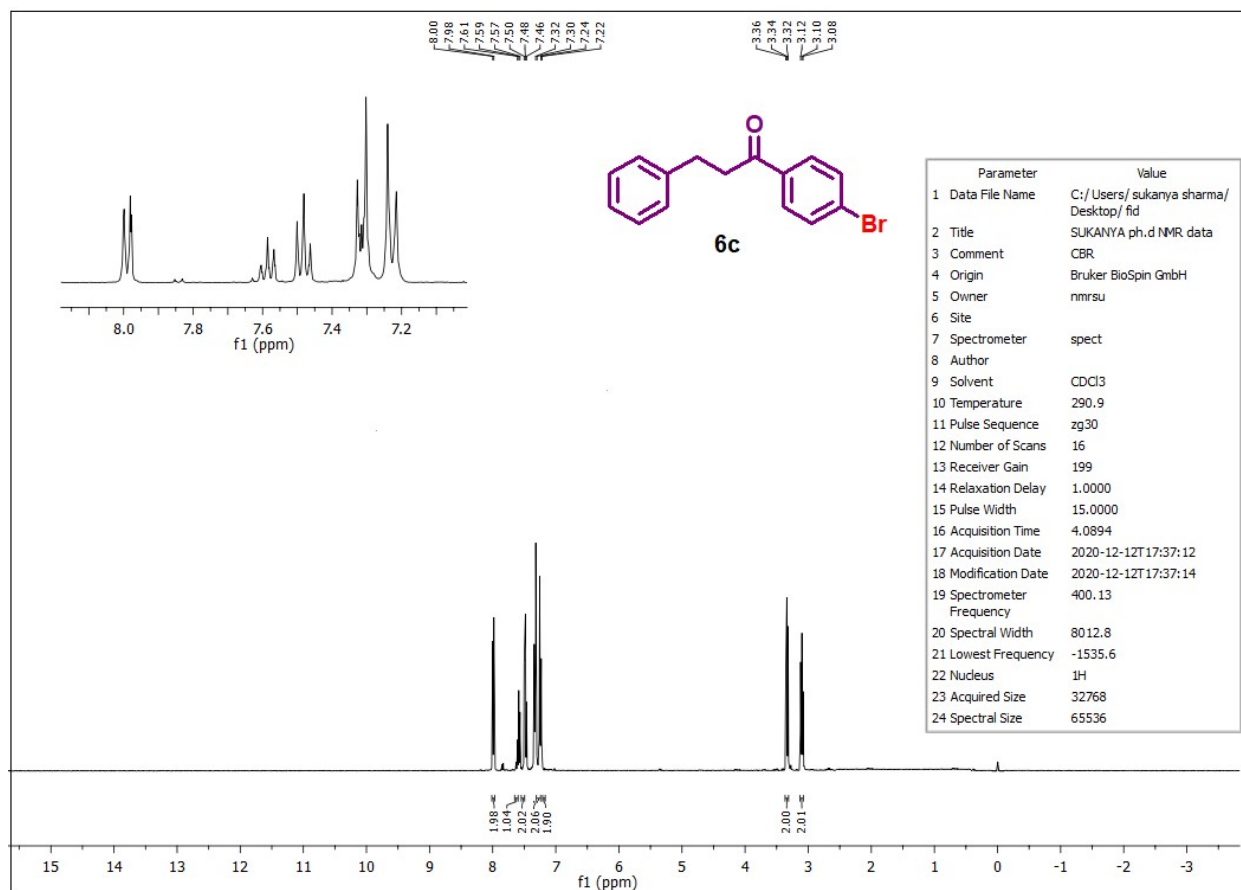

**Figure 45.** <sup>1</sup>H NMR spectra of 1-(4-bromophenyl)-3-phenylpropan-1-one.

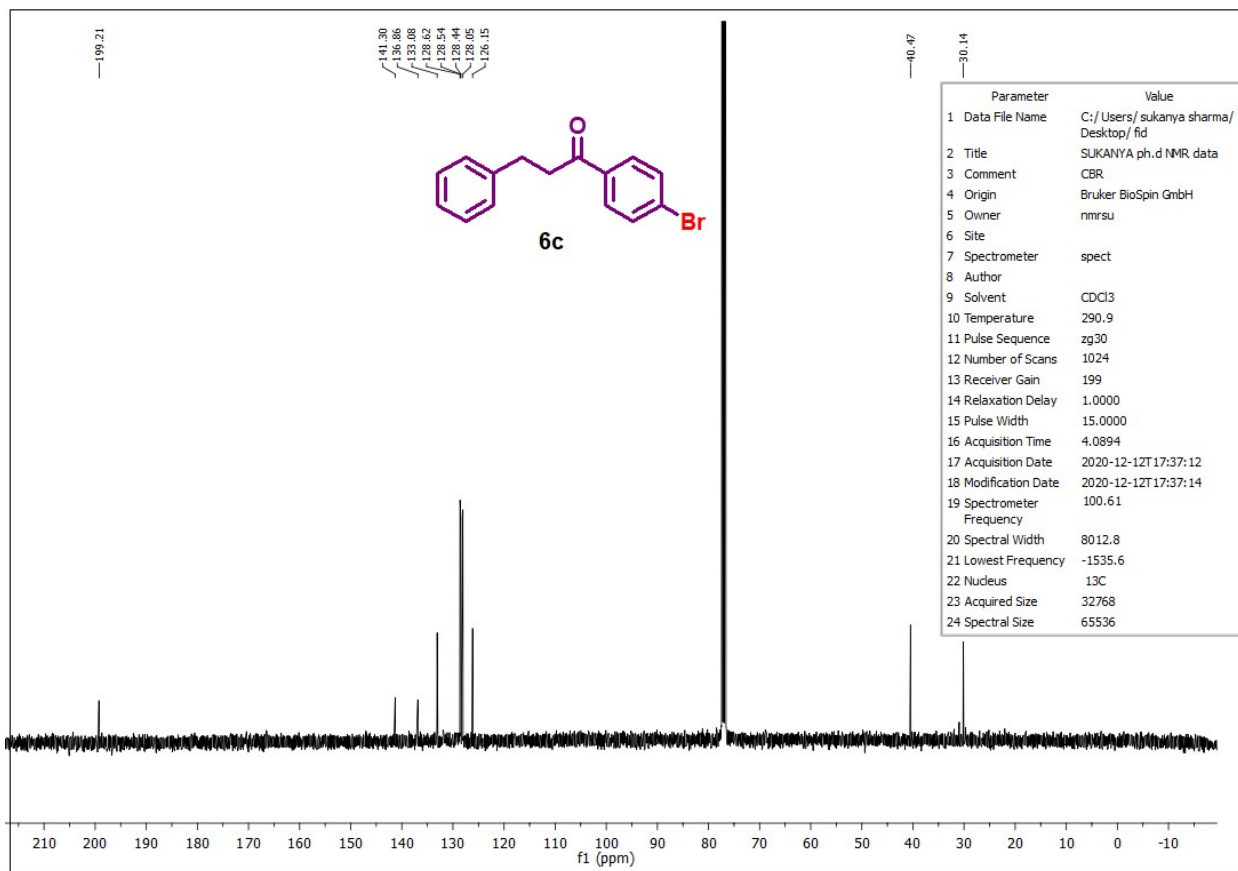

**Figure 46.**  $^{13}\text{C}$  NMR spectra of 1-(4-bromophenyl)-3-phenylpropan-1-one.

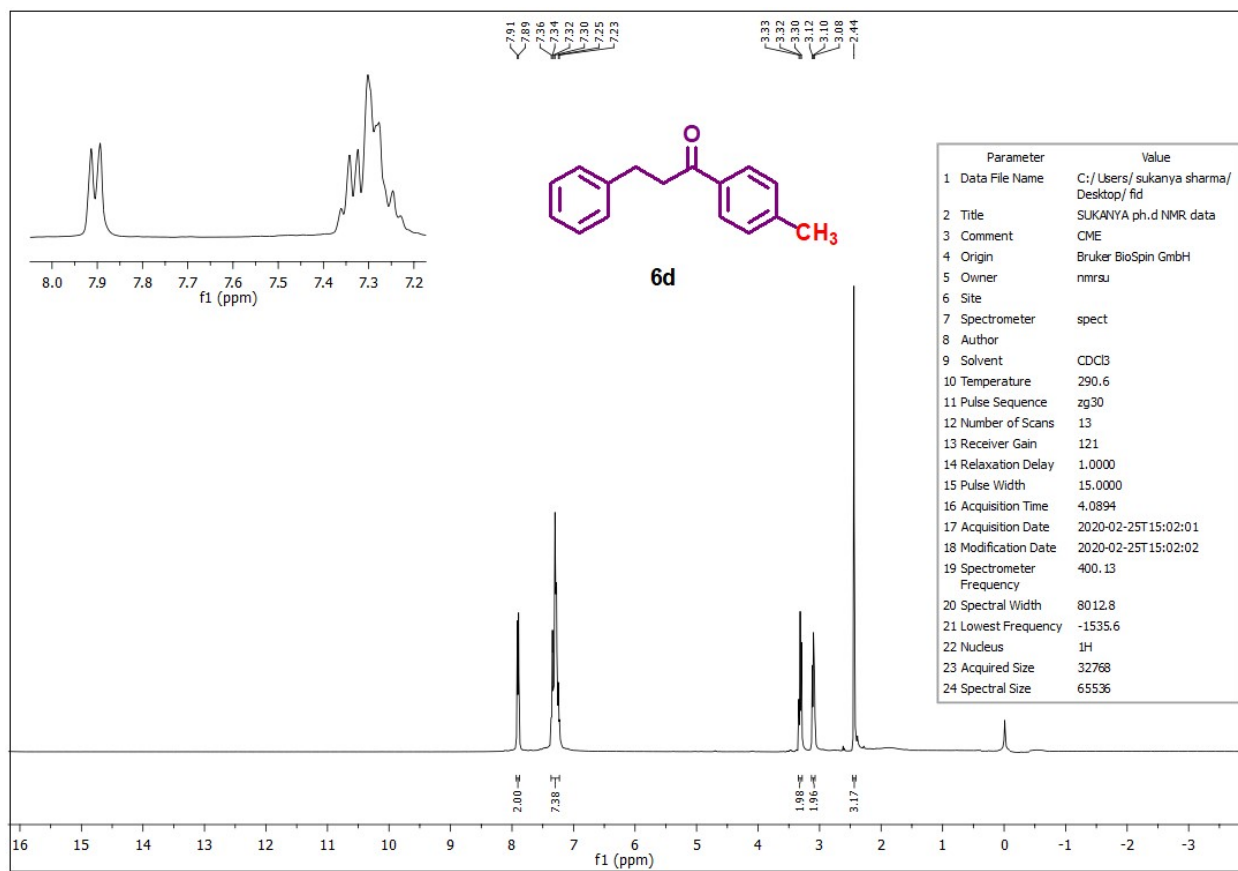

**Figure 47.** <sup>1</sup>H NMR spectra of 1-(4-methylphenyl)-3-phenylpropan-1-one

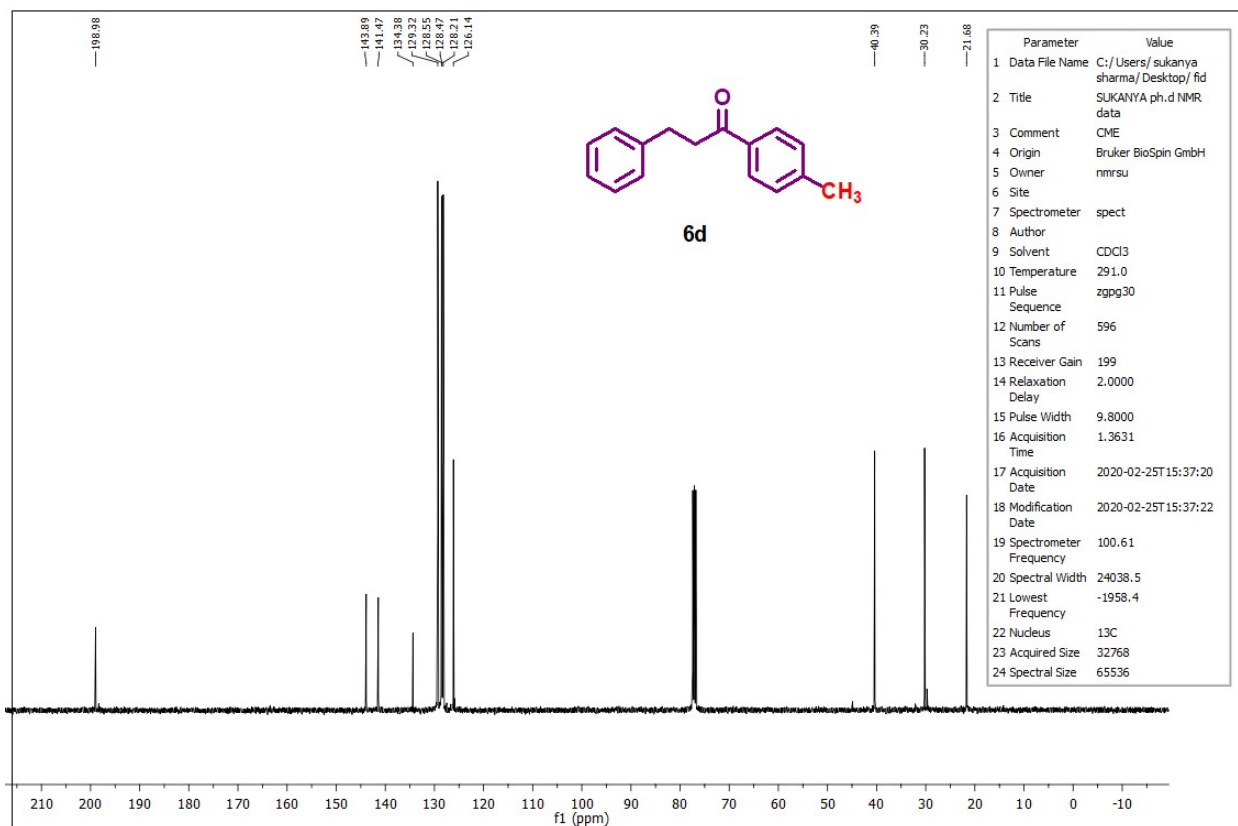

**Figure 48.**  $^{13}\text{C}$  NMR spectra of 1-(4-methylphenyl)-3-phenylpropan-1-one.

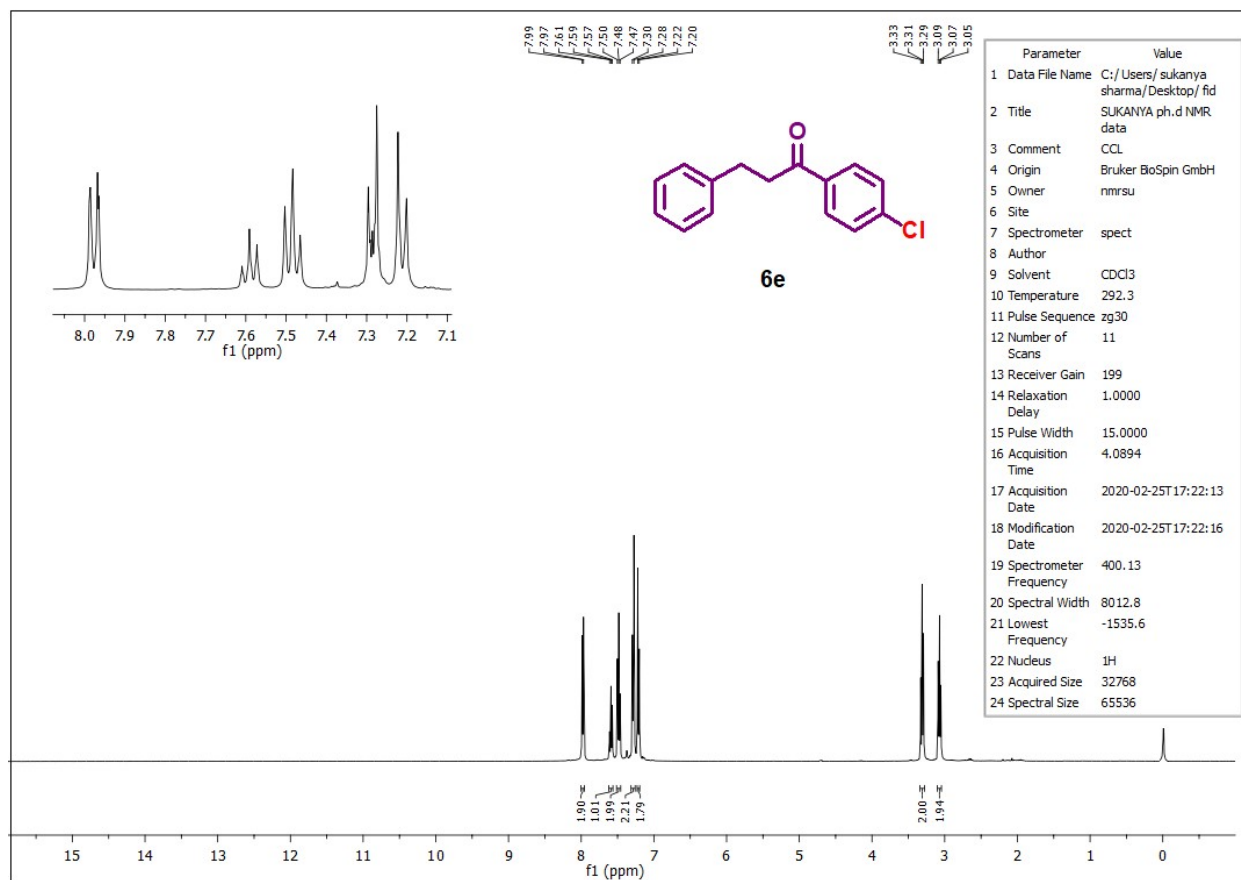

**Figure 49.**  $^1\text{H}$  NMR spectra of 1-(4-chlorophenyl)-3-phenylpropan-1-one.

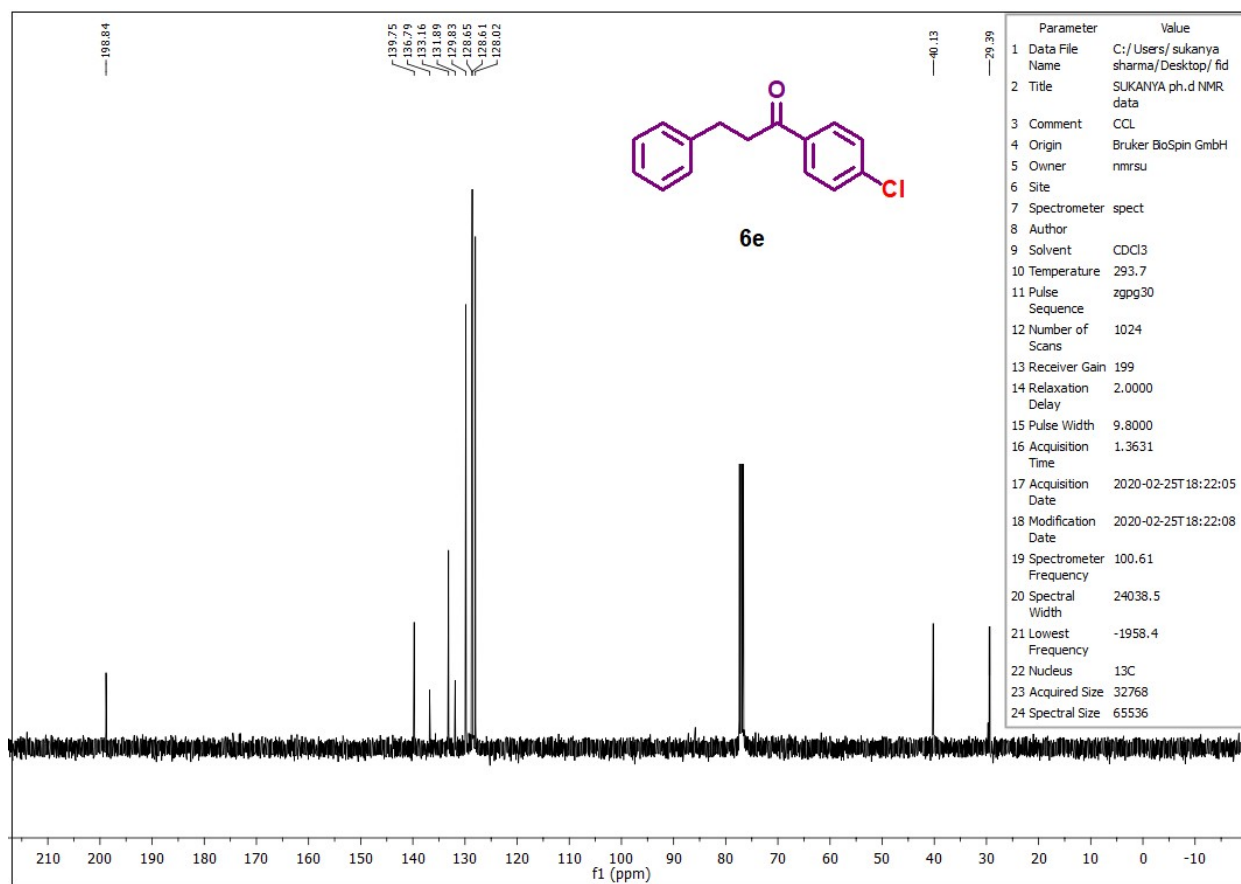

**Figure 50.**  $^{13}\text{C}$  NMR spectra of 1-(4-chlorophenyl)-3-phenylpropan-1-one.

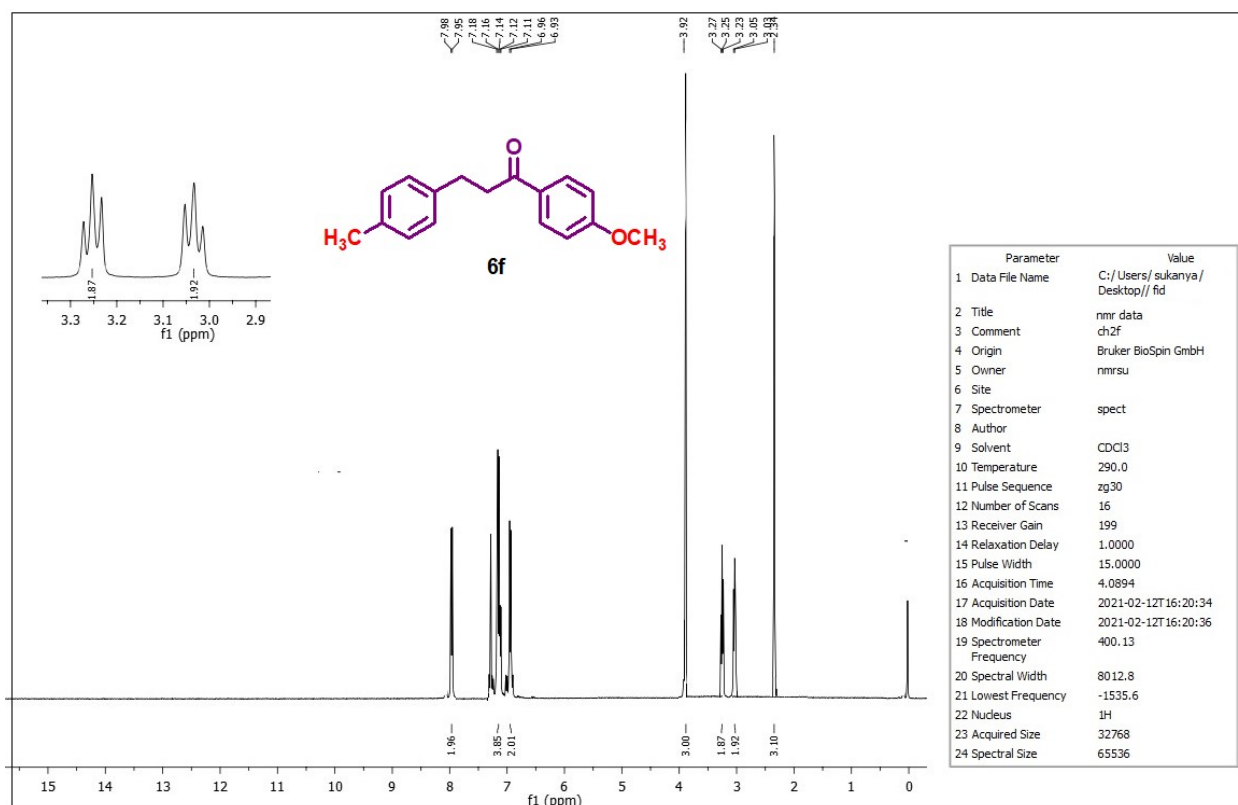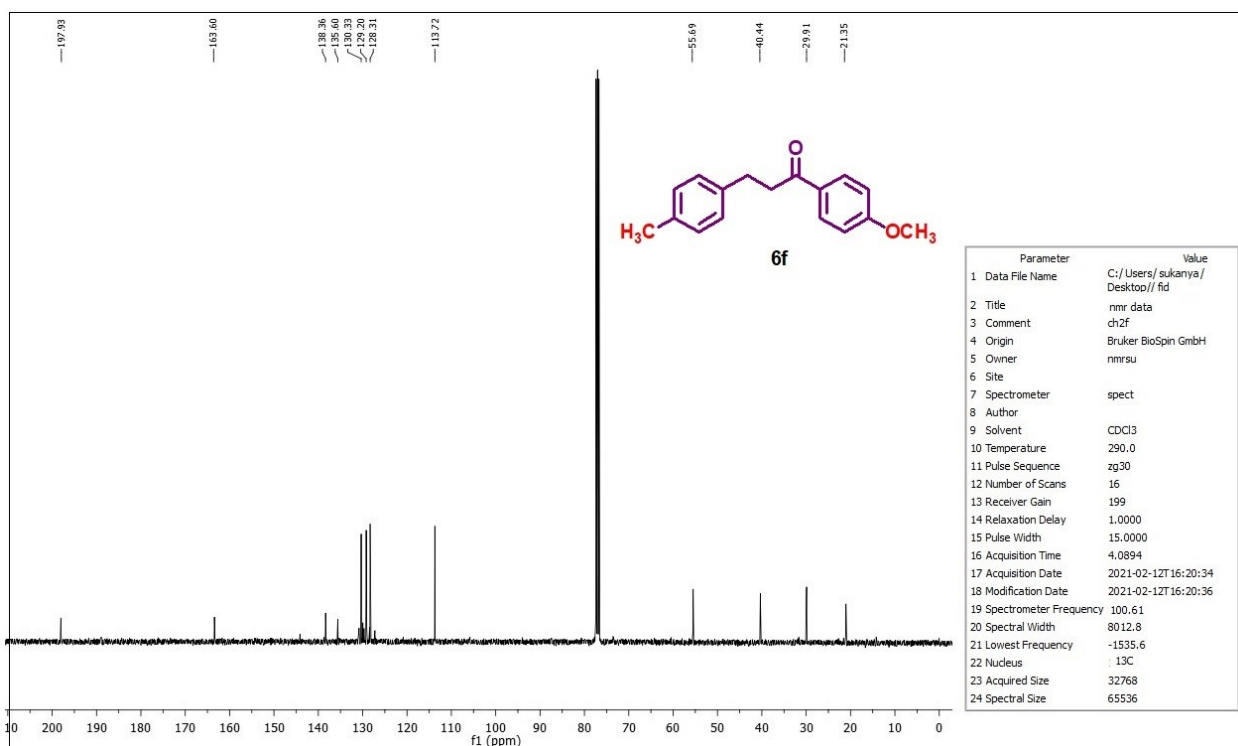



S6. <sup>1</sup>H NMR and <sup>13</sup>C NMR spectra of compounds listed in Table 6

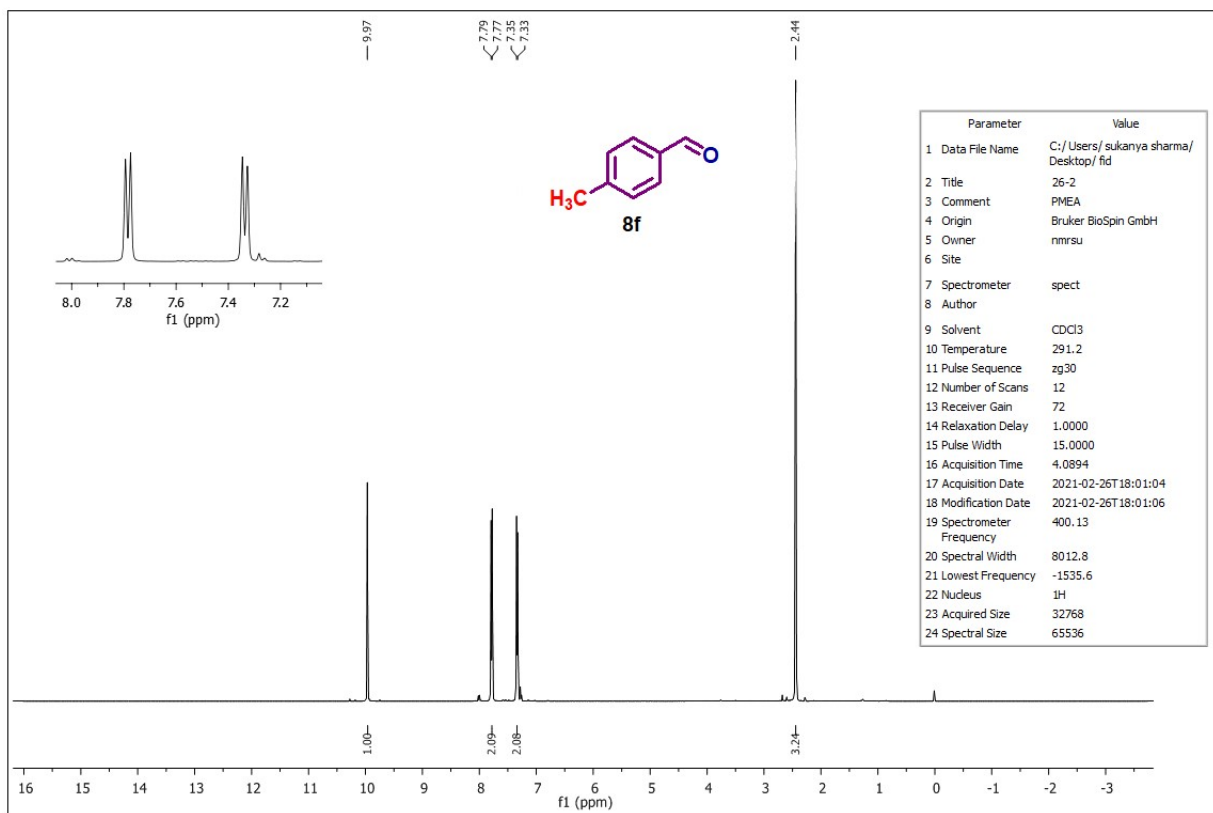

Figure 53. <sup>1</sup>H NMR spectra of 4-Methylbenzaldehyde.

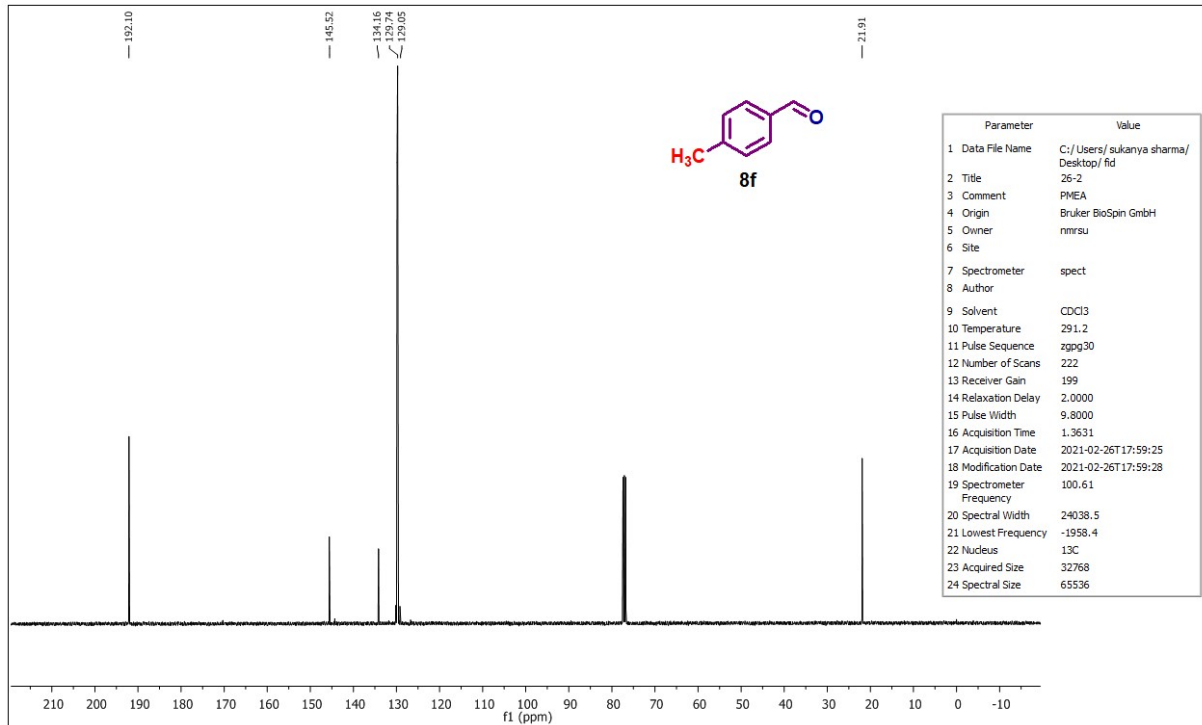

**Figure 54.**  $^{13}\text{C}$  NMR spectra of 4-Methylbenzaldehyde.

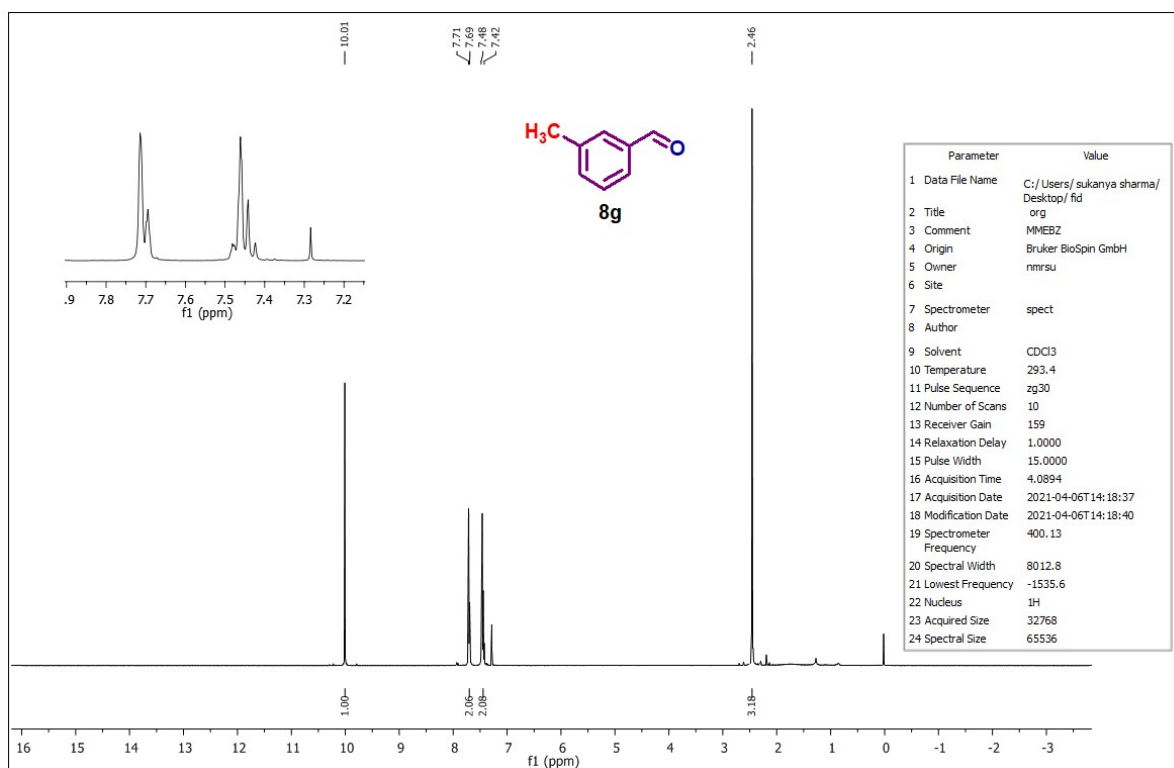

Figure 55.  $^1\text{H}$  NMR spectra of 3-Methylbenzaldehyde.

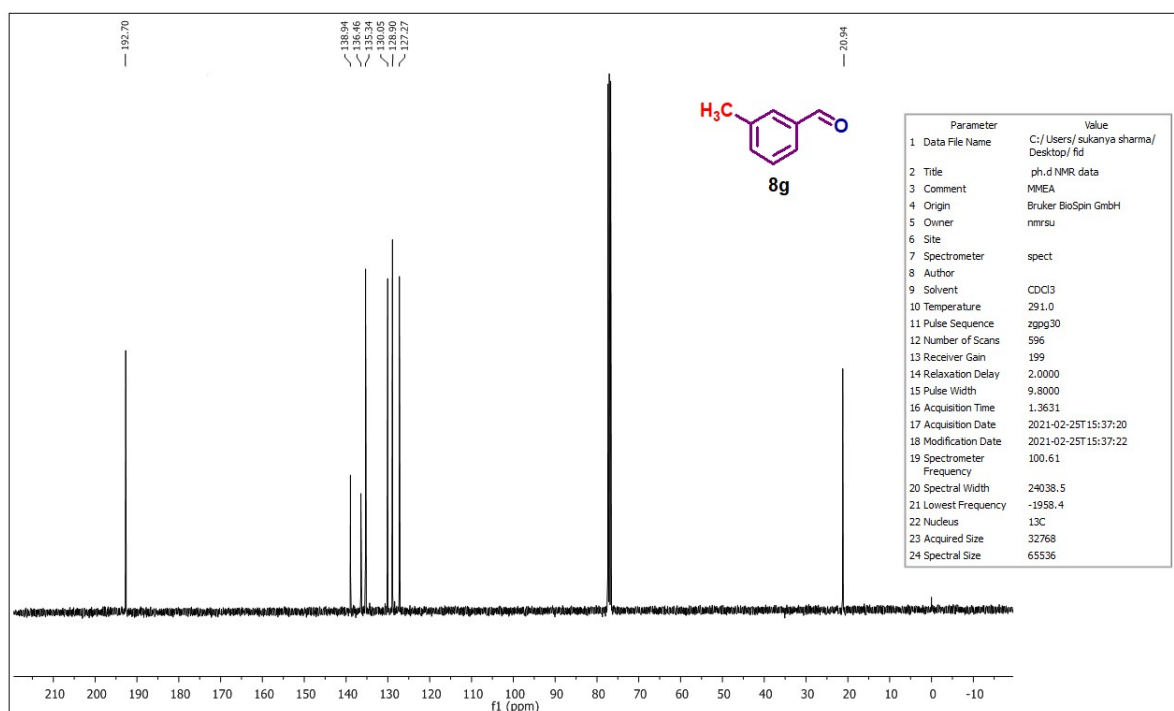

Figure 56.  $^{13}\text{C}$  NMR spectra of 3-Methylbenzaldehyde.
